# Supplementary material for: Biologically anchored knowledge expansion approach uncovers KLF4 as a novel insulin signaling regulator
Source: PubMed Central journal article supplement (PMC6150497; doi:10.1371/journal.pone.0204100), 2018-09-21

# S1 Fig

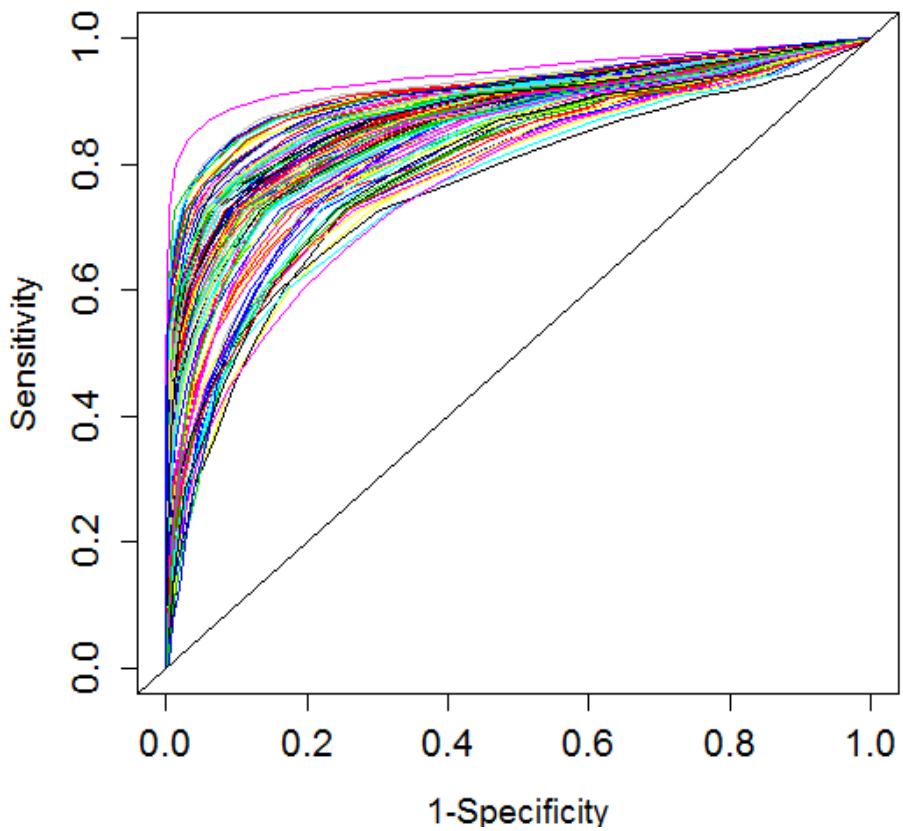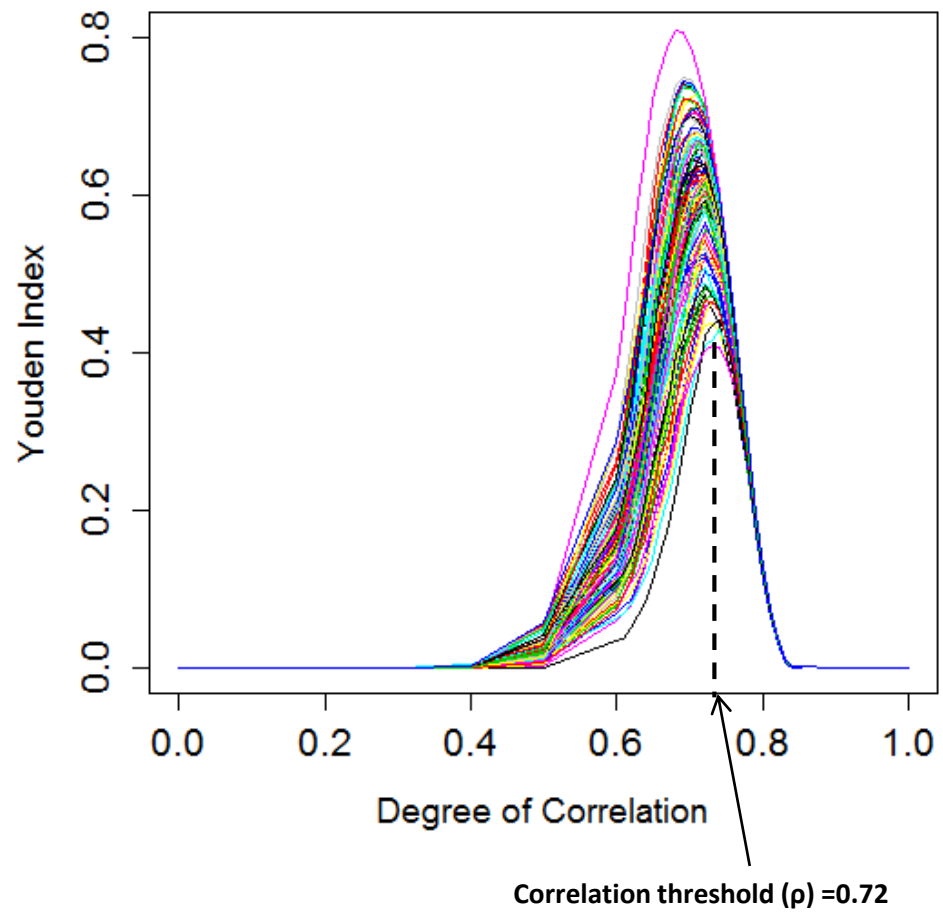

Supplement: pone.0204100.s001.pdf [file pone.0204100.s001.pdf]
