# Supplementary material for: Biologically anchored knowledge expansion approach uncovers KLF4 as a novel insulin signaling regulator
Source: PubMed Central journal article supplement (PMC6150497; doi:10.1371/journal.pone.0204100), 2018-09-21
Supplement: pone.0204100.s005.pdf [file pone.0204100.s005.pdf]

**S1 Table. Mouse Phenotype Data**

| Animal Group  | Blood Glucose (mg/dL) | Serum Insulin (ng/mL) | Adipose Tissue Weight/Body Weight (%) | Body Weight (g) |
|---------------|-----------------------|-----------------------|---------------------------------------|-----------------|
| DW8<br>(n=5)  | 181 +/- 6.9           | 3.25 +/- 0.65         | 1.57 +/- 0.12                         | 20.9 +/- 0.37   |
| DC8<br>(n=7)  | 178 +/- 4.8           | 3.03 +/- 0.63         | 1.3 +/- 0.07                          | 19.1 +/- 0.44   |
| DW16<br>(n=9) | 187 +/- 10.2          | 2.36 +/- 0.77         | 1.63 +/- 0.17                         | 21.9 +/- 0.67   |
| DC16<br>(n=5) | 172 +/- 12.1          | 1.96 +/- 0.39         | 1.16 +/- 0.08                         | 21.0 +/- 0.84   |
