# Supplementary material for: Biologically anchored knowledge expansion approach uncovers KLF4 as a novel insulin signaling regulator
Source: PubMed Central journal article supplement (PMC6150497; doi:10.1371/journal.pone.0204100), 2018-09-21
Supplement: pone.0204100.s006.pdf [file pone.0204100.s006.pdf]

**S2 Table. L<sub>0</sub> and L<sub>1</sub> Genes**

| <b>L<sub>0</sub> Genes</b> |                    |                                           |                            |
|----------------------------|--------------------|-------------------------------------------|----------------------------|
| <b>Probe Set ID</b>        | <b>Gene Symbol</b> | <b>Gene Title</b>                         | <b>L<sub>1</sub> Genes</b> |
| 1452925_a_at               | MARCH5             | membrane-associated ring finger (C3HC4) 5 | L1                         |
| 1438678_at                 | 1500011K16Rik      | RIKEN cDNA 1500011K16 gene                |                            |
| 1428732_at                 | 1700008J07Rik      | RIKEN cDNA 1700008J07 gene                | L1                         |
| 1453294_at                 | 1700012B15Rik      | RIKEN cDNA 1700012B15 gene                | L1                         |
| 1441871_at                 | 1810044D09Rik      | RIKEN cDNA 1810044D09 gene                |                            |
| 1429115_at                 | 2010003O02Rik      | RIKEN cDNA 2010003O02 gene                | L1                         |
| 1432607_at                 | 2610012C04Rik      | RIKEN cDNA 2610012C04 gene                | L1                         |
| 1453745_at                 | 2700038G22Rik      | RIKEN cDNA 2700038G22 gene                | L1                         |
| 1436235_x_at               | 4732471D19Rik      | RIKEN cDNA 4732471D19 gene                |                            |
| 1427326_at                 | 4732471D19Rik      | RIKEN cDNA 4732471D19 gene                | L1                         |
| 1431580_at                 | 4833421K07Rik      | RIKEN cDNA 4833421K07 gene                |                            |
| 1433142_at                 | 4921504P05Rik      | RIKEN cDNA 4921504P05 gene                | L1                         |
| 1429880_at                 | 4921531C22Rik      | RIKEN cDNA 4921531C22 gene                |                            |

|              |               |                                                        |    |
|--------------|---------------|--------------------------------------------------------|----|
| 1453390_at   | 4930428F12Rik | RIKEN cDNA 4930428F12 gene                             | L1 |
| 1433197_at   | 4930445B03Rik | RIKEN cDNA 4930445B03 gene                             | L1 |
| 1433082_at   | 4930448K20Rik | glyceraldehyde-3-phosphate<br>dehydrogenase pseudogene |    |
| 1431634_at   | 4930455C13Rik | RIKEN cDNA 4930455C13 gene                             | L1 |
| 1430175_at   | 4930588G05Rik | RIKEN cDNA 4930588G05 gene                             |    |
| 1432626_at   | 5730507A11Rik | RIKEN cDNA 5730507A11 gene                             | L1 |
| 1430646_at   | 5830407P18Rik | RIKEN cDNA 5830407P18 gene                             | L1 |
| 1433685_a_at | 6430706D22Rik | RIKEN cDNA 6430706D22 gene                             | L1 |
| 1432680_at   | 9130009M17Rik | RIKEN cDNA 9130009M17 gene                             | L1 |
| 1438299_at   | 9230108I15Rik | RIKEN cDNA 9230108I15 gene                             |    |
| 1439874_at   | 9330102E08Rik | RIKEN cDNA 9330102E08 gene                             | L1 |
| 1454592_at   | 9430012M22Rik | RIKEN cDNA 9430012M22 gene                             |    |
| 1456758_at   | 9930017N22Rik | RIKEN cDNA 9930017N22 gene                             | L1 |
| 1457517_at   | A730046G19Rik | RIKEN cDNA A730046G19 gene                             |    |

|              |               |                                                         |    |
|--------------|---------------|---------------------------------------------------------|----|
| 1439110_at   | A930012O16Rik | RIKEN cDNA A930012O16 gene                              | L1 |
| 1436942_at   | A930035D04Rik | RIKEN cDNA A930035D04 gene                              |    |
| 1444070_at   | AA914427      | EST AA914427                                            |    |
| 1452233_at   | ABCC1         | ATP-binding cassette, sub-family C (CFTR/MRP), member 1 | L1 |
| 1439835_x_at | ABCD2         | ATP-binding cassette, sub-family D (ALD), member 2      |    |
| 1416014_at   | ABCE1         | ATP-binding cassette, sub-family E (OABP), member 1     | L1 |
| 1452236_at   | ABCF1         | ATP-binding cassette, sub-family F (GCN20), member 1    |    |
| 1423570_at   | ABCG1         | ATP-binding cassette, sub-family G (WHITE), member 1    |    |
| 1427959_at   | ABHD10        | abhydrolase domain containing 10                        | L1 |
| 1418661_at   | ABHD2         | abhydrolase domain containing 2                         |    |
| 1417946_at   | ABHD3         | abhydrolase domain containing 3                         | L1 |

|              |         |                                                            |    |
|--------------|---------|------------------------------------------------------------|----|
| 1455313_at   | ABLIM2  | actin binding LIM protein family, member 2                 | L1 |
| 1427595_at   | ACACA   | acetyl-CoA carboxylase alpha                               |    |
| 1453206_at   | ACAD9   | acyl-CoA dehydrogenase family, member 9                    |    |
| 1423644_at   | ACO1    | aconitase 1, soluble                                       | L1 |
| 1431609_a_at | ACP5    | acid phosphatase 5, tartrate resistant                     |    |
| 1448445_at   | ACP6    | acid phosphatase 6, lysophosphatidic                       | L1 |
| 1460316_at   | ACSL1   | acyl-CoA synthetase long-chain family member 1             | L1 |
| 1427735_a_at | ACTA1   | actin, alpha 1, skeletal muscle                            |    |
| 1416569_at   | ACTL6A  | actin-like 6A                                              | L1 |
| 1423449_a_at | ACTN4   | actinin, alpha 4                                           | L1 |
| 1417157_at   | ACTR10  | actin-related protein 10 homolog ( <i>S. cerevisiae</i> )  | L1 |
| 1422561_at   | ADAMTS5 | ADAM metalloproteinase with thrombospondin type 1 motif, 5 |    |

|              |          |                                               |    |
|--------------|----------|-----------------------------------------------|----|
| 1433556_at   | ADAP1    | ArfGAP with dual PH domains 1                 | L1 |
| 1439613_at   | ADCY10   | adenylate cyclase 10 (soluble)                |    |
| 1419811_at   | ADCY9    | adenylate cyclase 9                           | L1 |
| 1434454_at   | ADCY9    | adenylate cyclase 9                           | L1 |
| 1420953_at   | ADD1     | adducin 1 (alpha)                             | L1 |
| 1441094_at   | Adh6b    | alcohol dehydrogenase 6B (class V)            |    |
| 1434329_s_at | ADIPOR2  | adiponectin receptor 2                        | L1 |
| 1416319_at   | ADK      | adenosine kinase                              | L1 |
| 1450214_at   | ADORA2B  | adenosine A2b receptor                        | L1 |
| 1451992_at   | ADRBK1   | adrenergic, beta, receptor kinase 1           | L1 |
| 1418372_at   | ADSL     | adenylosuccinate lyase                        | L1 |
| 1454727_at   | AFAP1L1  | actin filament associated protein 1-like<br>1 | L1 |
| 1426923_at   | AGFG1    | ArfGAP with FG repeats 1                      | L1 |
| 1452237_at   | AGFG1    | ArfGAP with FG repeats 1                      | L1 |
| 1435591_at   | AI426330 | expressed sequence AI426330                   | L1 |
| 1442197_at   | AI480624 | expressed sequence AI480624                   |    |
| 1456399_at   | AI842136 | expressed sequence AI842136                   | L1 |

|              |          |                                                                                          |    |
|--------------|----------|------------------------------------------------------------------------------------------|----|
| 1443923_at   | AKAP13   | A kinase (PRKA) anchor protein 13                                                        | L1 |
| 1447912_x_at | AKAP9    | A kinase (PRKA) anchor protein (yotiao) 9                                                | L1 |
| 1448894_at   | AKR1B10  | aldo-keto reductase family 1, member B10 (aldose reductase)                              | L1 |
| 1428158_at   | AKT1S1   | AKT1 substrate 1 (proline-rich)                                                          | L1 |
| 1426300_at   | ALCAM    | activated leukocyte cell adhesion molecule                                               |    |
| 1418844_at   | ALG9     | asparagine-linked glycosylation 9, alpha-1,2-mannosyltransferase homolog (S. cerevisiae) |    |
| 1434660_at   | ALKBH1   | alkB, alkylation repair homolog 1 (E. coli)                                              | L1 |
| 1428904_at   | AMMECR1L | AMME chromosomal region gene 1-like                                                      | L1 |
| 1422573_at   | AMPD3    | adenosine monophosphate deaminase 3                                                      | L1 |

|              |                 |                                                                     |    |
|--------------|-----------------|---------------------------------------------------------------------|----|
| 1415707_at   | ANAPC2          | anaphase promoting complex subunit<br>2                             |    |
| 1448008_at   | ANKHD1-EIF4EBP3 | ANKHD1-EIF4EBP3 readthrough                                         | L1 |
| 1435778_at   | ANKRD11         | ankyrin repeat domain 11                                            | L1 |
| 1436967_at   | ANKRD11         | ankyrin repeat domain 11                                            | L1 |
| 1437633_at   | ANKRD11         | ankyrin repeat domain 11                                            | L1 |
| 1456110_at   | ANKRD11         | ankyrin repeat domain 11                                            | L1 |
| 1443867_at   | ANKRD12         | ankyrin repeat domain 12                                            | L1 |
| 1428239_at   | ANKRD16         | ankyrin repeat domain 16                                            | L1 |
| 1444016_at   | ANXA1           | annexin A1                                                          | L1 |
| 1416307_at   | AP1M1           | adaptor-related protein complex 1, mu<br>1 subunit                  | L1 |
| 1426719_at   | APBB2           | amyloid beta (A4) precursor protein-<br>binding, family B, member 2 | L1 |
| 1424980_s_at | APH1A           | anterior pharynx defective 1 homolog<br>A ( <i>C. elegans</i> )     | L1 |
| 1421887_a_at | APLP2           | amyloid beta (A4) precursor-like<br>protein 2                       | L1 |
| 1423739_x_at | APLP2           | amyloid beta (A4) precursor-like<br>protein 2                       | L1 |
| 1416371_at   | APOD            | apolipoprotein D                                                    |    |

|              |            |                                                     |    |
|--------------|------------|-----------------------------------------------------|----|
| 1452800_a_at | APOO       | apolipoprotein O                                    | L1 |
| 1429248_at   | APOPT1     | apoptogenic 1, mitochondrial                        | L1 |
| 1416203_at   | AQP1       | aquaporin 1 (Colton blood group)                    | L1 |
| 1418687_at   | ARC        | activity-regulated cytoskeleton-associated protein  | L1 |
| 1421134_at   | AREG/AREGB | amphiregulin                                        | L1 |
| 1423052_at   | ARF4       | ADP-ribosylation factor 4                           | L1 |
| 1423053_at   | ARF4       | ADP-ribosylation factor 4                           | L1 |
| 1426534_a_at | ARFGAP3    | ADP-ribosylation factor GTPase activating protein 3 | L1 |
| 1424240_at   | ARFIP2     | ADP-ribosylation factor interacting protein 2       | L1 |
| 1451309_at   | ARHGAP1    | Rho GTPase activating protein 1                     | L1 |
| 1431133_at   | ARHGAP18   | Rho GTPase activating protein 18                    | L1 |
| 1423194_at   | ARHGAP5    | Rho GTPase activating protein 5                     | L1 |
| 1419457_at   | ARHGEF28   | Rho guanine nucleotide exchange factor (GEF) 28     | L1 |



|              |          |                                                        |    |
|--------------|----------|--------------------------------------------------------|----|
| 1436725_at   | ARHGEF39 | Rho guanine nucleotide exchange factor (GEF) 39        |    |
| 1436768_x_at | ARHGEF40 | Rho guanine nucleotide exchange factor (GEF) 40        |    |
| 1455810_a_at | ARHGEF40 | Rho guanine nucleotide exchange factor (GEF) 40        |    |
| 1431024_a_at | ARID4B   | AT rich interactive domain 4B (RBP1-like)              |    |
| 1451847_s_at | ARID4B   | AT rich interactive domain 4B (RBP1-like)              | L1 |
| 1420973_at   | ARID5B   | AT rich interactive domain 5B (MRF1-like)              | L1 |
| 1417331_a_at | ARL6     | ADP-ribosylation factor-like 6                         | L1 |
| 1425914_a_at | ARMCX1   | armadillo repeat containing, X-linked 1                |    |
| 1416226_at   | ARPC1B   | actin related protein 2/3 complex, subunit 1B, 41kDa   | L1 |
| 1425572_a_at | ASAP1    | ArfGAP with SH3 domain, ankyrin repeat and PH domain 1 |    |

|              |                 |                                                                           |    |
|--------------|-----------------|---------------------------------------------------------------------------|----|
| 1425573_a_at | ASAP1           | ArfGAP with SH3 domain, ankyrin repeat and PH domain 1                    |    |
| 1417361_at   | ASB3/GPR75-ASB3 | ankyrin repeat and SOCS box containing 3                                  | L1 |
| 1437086_at   | ASCL1           | achaete-scute complex homolog 1 (Drosophila)                              |    |
| 1425274_at   | ASPH            | aspartate beta-hydroxylase                                                |    |
| 1450058_at   | ASPH            | aspartate beta-hydroxylase                                                |    |
| 1435077_at   | ASXL1           | additional sex combs like 1 (Drosophila)                                  | L1 |
| 1446838_at   | ATAD1           | ATPase family, AAA domain containing 1                                    |    |
| 1429396_at   | ATG16L2         | autophagy related 16-like 2 (S. cerevisiae)                               | L1 |
| 1428260_at   | ATL1            | atlastin GTPase 1                                                         | L1 |
| 1447851_x_at | ATP10A          | ATPase, class V, type 10A                                                 | L1 |
| 1456388_at   | ATP11A          | ATPase, class VI, type 11A                                                |    |
| 1427481_a_at | ATP1A3          | ATPase, Na <sup>+</sup> /K <sup>+</sup> transporting, alpha 3 polypeptide |    |

|              |                    |                                                                      |    |
|--------------|--------------------|----------------------------------------------------------------------|----|
| 1416551_at   | ATP2A2             | ATPase, Ca <sup>++</sup> transporting, cardiac muscle, slow twitch 2 |    |
| 1427251_at   | ATP2A2             | ATPase, Ca <sup>++</sup> transporting, cardiac muscle, slow twitch 2 | L1 |
| 1452363_a_at | ATP2A2             | ATPase, Ca <sup>++</sup> transporting, cardiac muscle, slow twitch 2 | L1 |
| 1416391_at   | ATP5J2-PTCD1/PTCD1 | pentatricopeptide repeat domain 1                                    |    |
| 1420947_at   | ATRX               | alpha thalassemia/mental retardation syndrome X-linked               |    |
| 1420946_at   | ATRX               | alpha thalassemia/mental retardation syndrome X-linked               | L1 |
| 1422576_at   | ATXN10             | ataxin 10                                                            | L1 |
| 1419866_s_at | ATXN2              | ataxin 2                                                             | L1 |
| 1460653_at   | ATXN2              | ataxin 2                                                             | L1 |
| 1439497_at   | ATXN7L1            | ataxin 7-like 1                                                      | L1 |
| 1455492_at   | B330016D10Rik      | RIKEN cDNA B330016D10 gene                                           |    |

|              |          |                                                                            |    |
|--------------|----------|----------------------------------------------------------------------------|----|
| 1423084_at   | B3GALT2  | UDP-Gal:betaGlcNAc beta 1,3-galactosyltransferase, polypeptide 2           |    |
| 1425934_a_at | B4GALT4  | UDP-Gal:betaGlcNAc beta 1,4-galactosyltransferase, polypeptide 4           | L1 |
| 1421824_at   | BACE1    | beta-site APP-cleaving enzyme 1                                            | L1 |
| 1425656_a_at | BAIAP2   | BAI1-associated protein 2                                                  | L1 |
| 1451539_at   | BAIAP2L1 | BAI1-associated protein 2-like 1                                           |    |
| 1423753_at   | BAMBI    | BMP and activin membrane-bound inhibitor homolog ( <i>Xenopus laevis</i> ) | L1 |
| 1426354_at   | BAP1     | BRCA1 associated protein-1 (ubiquitin carboxy-terminal hydrolase)          | L1 |
| 1433599_at   | BAZ1A    | bromodomain adjacent to zinc finger domain, 1A                             | L1 |
| 1440805_at   | BAZ1B    | bromodomain adjacent to zinc finger domain, 1B                             |    |

|              |         |                                                                       |    |
|--------------|---------|-----------------------------------------------------------------------|----|
| 1454684_at   | BBS7    | Bardet-Biedl syndrome 7                                               | L1 |
| 1439388_s_at | BCAR1   | breast cancer anti-estrogen resistance<br>1                           | L1 |
| 1450622_at   | BCAR1   | breast cancer anti-estrogen resistance<br>1                           | L1 |
| 1415936_at   | BCAR3   | breast cancer anti-estrogen resistance<br>3                           |    |
| 1418971_x_at | BCL10   | B-cell CLL/lymphoma 10                                                |    |
| 1418970_a_at | BCL10   | B-cell CLL/lymphoma 10                                                | L1 |
| 1418972_at   | BCL10   | B-cell CLL/lymphoma 10                                                | L1 |
| 1424406_at   | BCL2L13 | BCL2-like 13 (apoptosis facilitator)                                  | L1 |
| 1436023_at   | BCLAF1  | BCL2-associated transcription factor 1                                | L1 |
| 1454172_at   | BCORL1  | BCL6 corepressor-like 1                                               |    |
| 1430549_at   | BET1L   | blocked early in transport 1 homolog<br>( <i>S. cerevisiae</i> )-like |    |
| 1427488_a_at | BIRC6   | baculoviral IAP repeat containing 6                                   |    |
| 1420631_a_at | BLCAP   | bladder cancer associated protein                                     | L1 |

|              |        |                                                                        |    |
|--------------|--------|------------------------------------------------------------------------|----|
| 1426238_at   | BMP1   | bone morphogenetic protein 1                                           | L1 |
| 1421103_at   | BMP2K  | BMP2 inducible kinase                                                  | L1 |
| 1422912_at   | BMP4   | bone morphogenetic protein 4                                           | L1 |
| 1419616_at   | BMPR2  | bone morphogenetic protein receptor, type II (serine/threonine kinase) |    |
| 1428669_at   | Bmyc   | brain expressed myelocytomatosis oncogene                              |    |
| 1426869_at   | BOC    | Boc homolog (mouse)                                                    | L1 |
| 1460005_at   | BOD1L1 | bioorientation of chromosomes in cell division 1-like 1                | L1 |
| 1417040_a_at | BOK    | BCL2-related ovarian killer                                            | L1 |
| 1418378_at   | BPIFB2 | BPI fold containing family B, member 2                                 |    |
| 1427311_at   | BPTF   | bromodomain PHD finger transcription factor                            | L1 |
| 1438771_at   | BRD1   | bromodomain containing 1                                               | L1 |
| 1427192_a_at | BRD8   | bromodomain containing 8                                               | L1 |
| 1451137_a_at | BRD8   | bromodomain containing 8                                               | L1 |

|              |           |                                                             |    |
|--------------|-----------|-------------------------------------------------------------|----|
| 1426312_at   | BRE       | brain and reproductive organ-expressed (TNFRSF1A modulator) | L1 |
| 1435153_at   | BTBD6     | BTB (POZ) domain containing 6                               | L1 |
| 1432910_at   | BTBD7     | BTB (POZ) domain containing 7                               |    |
| 1431230_a_at | BTBD9     | BTB (POZ) domain containing 9                               | L1 |
| 1449007_at   | BTG3      | BTG family, member 3                                        | L1 |
| 1428632_at   | C11orf10  | chromosome 11 open reading frame 10                         | L1 |
| 1439859_at   | C12orf5   | chromosome 12 open reading frame 5                          | L1 |
| 1430095_at   | C12orf56  | chromosome 12 open reading frame 56                         |    |
| 1451303_at   | C14orf102 | chromosome 14 open reading frame 102                        | L1 |
| 1416917_at   | C14orf119 | chromosome 14 open reading frame 119                        | L1 |
| 1428450_at   | C15orf38  | chromosome 15 open reading frame 38                         | L1 |

|              |           |                                         |    |
|--------------|-----------|-----------------------------------------|----|
| 1426347_at   | C15orf44  | chromosome 15 open reading frame<br>44  | L1 |
| 1426828_at   | C16orf7   | chromosome 16 open reading frame 7      | L1 |
| 1452896_at   | C16orf80  | chromosome 16 open reading frame<br>80  | L1 |
| 1420548_a_at | C16orf88  | chromosome 16 open reading frame<br>88  | L1 |
| 1428809_at   | C17orf58  | chromosome 17 open reading frame<br>58  | L1 |
| 1416886_at   | C1D       | C1D nuclear receptor corepressor        | L1 |
| 1419174_at   | C1orf52   | chromosome 1 open reading frame 52      | L1 |
| 1416051_at   | C2        | complement component 2                  | L1 |
| 1457664_x_at | C2        | complement component 2                  | L1 |
| 1438038_at   | C20orf194 | chromosome 20 open reading frame<br>194 | L1 |
| 1424724_a_at | C21orf91  | chromosome 21 open reading frame<br>91  | L1 |
| 1428085_at   | C2orf43   | chromosome 2 open reading frame 43      | L1 |
| 1437439_at   | C5orf42   | chromosome 5 open reading frame 42      | L1 |



|              |          |                                                                                  |    |
|--------------|----------|----------------------------------------------------------------------------------|----|
| 1423306_at   | C5orf62  | chromosome 5 open reading frame 62                                               | L1 |
| 1428217_at   | C6orf120 | chromosome 6 open reading frame 120                                              |    |
| 1453818_a_at | C6orf70  | chromosome 6 open reading frame 70                                               | L1 |
| 1458879_at   | C76798   | expressed sequence C76798                                                        |    |
| 1429451_at   | C8orf37  | chromosome 8 open reading frame 37                                               | L1 |
| 1423879_at   | C9orf40  | chromosome 9 open reading frame 40                                               |    |
| 1452307_at   | CABLES2  | Cdk5 and Abl enzyme substrate 2                                                  | L1 |
| 1436031_at   | CACHD1   | cache domain containing 1                                                        |    |
| 1452829_at   | CAD      | carbamoyl-phosphate synthetase 2, aspartate transcarbamylase, and dihydroorotase | L1 |
| 1427763_a_at | CAMK2D   | calcium/calmodulin-dependent protein kinase II delta                             | L1 |
| 1455751_at   | CAND1    | cullin-associated and neddylation-dissociated 1                                  | L1 |
| 1427944_at   | CAPRIN2  | caprin family member 2                                                           |    |

|              |         |                                                            |    |
|--------------|---------|------------------------------------------------------------|----|
| 1452038_at   | CAPZA1  | capping protein (actin filament)<br>muscle Z-line, alpha 1 | L1 |
| 1455886_at   | CBL     | Cbl proto-oncogene, E3 ubiquitin<br>protein ligase         | L1 |
| 1451531_at   | CBWD1   | COBW domain containing 1                                   | L1 |
| 1421933_at   | CBX5    | chromobox homolog 5                                        |    |
| 1451442_at   | CCDC104 | coiled-coil domain containing 104                          | L1 |
| 1432094_a_at | CCDC132 | coiled-coil domain containing 132                          | L1 |
| 1428261_at   | CCDC134 | coiled-coil domain containing 134                          |    |
| 1452721_a_at | CCDC53  | coiled-coil domain containing 53                           | L1 |
| 1424187_at   | CCDC80  | coiled-coil domain containing 80                           |    |
| 1427138_at   | CCDC88C | coiled-coil domain containing 88C                          | L1 |
| 1428505_at   | CCDC90B | coiled-coil domain containing 90B                          | L1 |
| 1417789_at   | CCL11   | chemokine (C-C motif) ligand 11                            | L1 |
| 1420380_at   | CCL13   | chemokine (C-C motif) ligand 13                            |    |
| 1423622_a_at | CCNL1   | cyclin L1                                                  | L1 |

|              |            |                                                                                                |    |
|--------------|------------|------------------------------------------------------------------------------------------------|----|
| 1432195_s_at | CCNL2      | cyclin L2                                                                                      | L1 |
| 1428413_at   | CCNY       | cyclin Y                                                                                       | L1 |
| 1433554_at   | CCZ1/CCZ1B | CCZ1 vacuolar protein trafficking and biogenesis associated homolog B ( <i>S. cerevisiae</i> ) | L1 |
| 1422105_at   | CD3E       | CD3e molecule, epsilon (CD3-TCR complex)                                                       | L1 |
| 1419554_at   | CD47       | CD47 molecule                                                                                  | L1 |
| 1449507_a_at | CD47       | CD47 molecule                                                                                  | L1 |
| 1456046_at   | CD93       | CD93 molecule                                                                                  |    |
| 1456746_a_at | Cd99l2     | CD99 antigen-like 2                                                                            | L1 |
| 1456747_x_at | Cd99l2     | CD99 antigen-like 2                                                                            | L1 |
| 1425556_at   | CDK12      | cyclin-dependent kinase 12                                                                     |    |
| 1455567_at   | CDK12      | cyclin-dependent kinase 12                                                                     | L1 |
| 1415956_a_at | CDK16      | cyclin-dependent kinase 16                                                                     | L1 |
| 1426885_a_at | CDK2AP1    | cyclin-dependent kinase 2 associated protein 1                                                 | L1 |
| 1450674_at   | CDK5       | cyclin-dependent kinase 5                                                                      | L1 |

|              |        |                                                      |    |
|--------------|--------|------------------------------------------------------|----|
| 1457625_s_at | CDKL2  | cyclin-dependent kinase-like 2 (CDC2-related kinase) |    |
| 1417649_at   | CDKN1C | cyclin-dependent kinase inhibitor 1C (p57, Kip2)     |    |
| 1418982_at   | CEBPA  | CCAAT/enhancer binding protein (C/EBP), alpha        | L1 |
| 1427413_a_at | CELF1  | CUGBP, Elav-like family member 1                     |    |
| 1429326_at   | CENPL  | centromere protein L                                 | L1 |
| 1452470_at   | CEP350 | centrosomal protein 350kDa                           |    |
| 1437209_at   | CEP76  | centrosomal protein 76kDa                            | L1 |
| 1429670_a_at | CEP97  | centrosomal protein 97kDa                            |    |
| 1448052_at   | CGNL1  | cingulin-like 1                                      |    |
| 1438476_a_at | CHD4   | chromodomain helicase DNA binding protein 4          |    |
| 1437745_at   | CHD7   | chromodomain helicase DNA binding protein 7          | L1 |
| 1455435_s_at | CHDH   | choline dehydrogenase                                |    |
| 1451896_a_at | CHERP  | calcium homeostasis endoplasmic reticulum protein    | L1 |

|              |         |                                                              |    |
|--------------|---------|--------------------------------------------------------------|----|
| 1454023_a_at | CHPF    | chondroitin polymerizing factor                              | L1 |
| 1452170_at   | CHPF2   | chondroitin polymerizing factor 2                            | L1 |
| 1426146_a_at | CHPT1   | choline phosphotransferase 1                                 | L1 |
| 1426866_at   | CHST14  | carbohydrate (N-acetylgalactosamine 4-O) sulfotransferase 14 |    |
| 1417091_at   | CHUK    | conserved helix-loop-helix ubiquitous kinase                 | L1 |
| 1430992_s_at | CISD2   | CDGSH iron sulfur domain 2                                   | L1 |
| 1448724_at   | CISH    | cytokine inducible SH2-containing protein                    | L1 |
| 1437271_at   | CLCF1   | cardiotrophin-like cytokine factor 1                         | L1 |
| 1452702_at   | CLCN7   | chloride channel, voltage-sensitive 7                        | L1 |
| 1438467_at   | CLEC10A | C-type lectin domain family 10, member A                     | L1 |
| 1456318_at   | CLEC1A  | C-type lectin domain family 1, member A                      | L1 |
| 1448250_at   | CLMP    | CXADR-like membrane protein                                  | L1 |
| 1421861_at   | CLSTN1  | calsyntenin 1                                                | L1 |

|              |         |                                                              |    |
|--------------|---------|--------------------------------------------------------------|----|
| 1441165_s_at | CLSTN2  | calsyntenin 2                                                |    |
| 1452597_at   | CMC2    | COX assembly mitochondrial protein 2 homolog (S. cerevisiae) | L1 |
| 1427980_at   | CMIP    | c-Maf inducing protein                                       | L1 |
| 1451114_at   | CMTM6   | CKLF-like MARVEL transmembrane domain containing 6           | L1 |
| 1436436_at   | CNIH4   | cornichon homolog 4 (Drosophila)                             |    |
| 1450981_at   | CNN2    | calponin 2                                                   | L1 |
| 1425480_at   | CNOT6L  | CCR4-NOT transcription complex, subunit 6-like               | L1 |
| 1430519_a_at | CNOT7   | CCR4-NOT transcription complex, subunit 7                    | L1 |
| 1421292_a_at | COBRA1  | cofactor of BRCA1                                            | L1 |
| 1433774_x_at | COG1    | component of oligomeric golgi complex 1                      | L1 |
| 1449053_s_at | COG1    | component of oligomeric golgi complex 1                      | L1 |
| 1416692_at   | COIL    | coilin                                                       | L1 |
| 1448755_at   | COL15A1 | collagen, type XV, alpha 1                                   | L1 |
| 1424051_at   | COL4A2  | collagen, type IV, alpha 2                                   |    |

|              |        |                                                                     |    |
|--------------|--------|---------------------------------------------------------------------|----|
| 1419703_at   | COL5A3 | collagen, type V, alpha 3                                           | L1 |
| 1454642_a_at | COMMD3 | COMM domain containing 3                                            | L1 |
| 1449694_s_at | COMMD5 | COMM domain containing 5                                            |    |
| 1423301_at   | COPB1  | coatamer protein complex, subunit beta 1                            | L1 |
| 1416163_at   | COPS4  | COP9 constitutive photomorphogenic homolog subunit 4 (Arabidopsis)  | L1 |
| 1423245_at   | COPS7A | COP9 constitutive photomorphogenic homolog subunit 7A (Arabidopsis) | L1 |
| 1415934_at   | COPS8  | COP9 constitutive photomorphogenic homolog subunit 8 (Arabidopsis)  | L1 |
| 1449660_s_at | CORO1C | coronin, actin binding protein, 1C                                  | L1 |
| 1426693_x_at | COX15  | COX15 homolog, cytochrome c oxidase assembly protein (yeast)        | L1 |
| 1418709_at   | COX7A1 | cytochrome c oxidase subunit VIIa polypeptide 1 (muscle)            |    |

|              |                         |                                                     |    |
|--------------|-------------------------|-----------------------------------------------------|----|
| 1449218_at   | Cox8b                   | cytochrome c oxidase, subunit VIIIb                 |    |
| 1417496_at   | CP                      | ceruloplasmin (ferroxidase)                         |    |
| 1433439_at   | CPNE1                   | copine I                                            | L1 |
| 1423964_at   | CPSF3L                  | cleavage and polyadenylation specific factor 3-like | L1 |
| 1448901_at   | CPXM1                   | carboxypeptidase X (M14 family), member 1           | L1 |
| 1456042_s_at | CRAMP1L                 | Crm, cramped-like (Drosophila)                      |    |
| 1431930_x_at | CRLS1                   | cardiolipin synthase 1                              | L1 |
| 1448592_at   | CRTAP                   | cartilage associated protein                        | L1 |
| 1424660_s_at | CRTC2                   | CREB regulated transcription coactivator 2          | L1 |
| 1429373_x_at | CRTC2                   | CREB regulated transcription coactivator 2          | L1 |
| 1449932_at   | CSNK1D                  | casein kinase 1, delta                              | L1 |
| 1460646_at   | CSNK2A2                 | casein kinase 2, alpha prime polypeptide            | L1 |
| 1422140_at   | Csprs (includes others) | component of Sp100-rs                               |    |
| 1415702_a_at | CTBP1                   | C-terminal binding protein 1                        | L1 |
| 1421315_s_at | CTTN                    | cortactin                                           | L1 |



|              |         |                                                                       |    |
|--------------|---------|-----------------------------------------------------------------------|----|
| 1427620_at   | CUL9    | cullin 9                                                              |    |
| 1426455_at   | CWC27   | CWC27 spliceosome-associated protein homolog ( <i>S. cerevisiae</i> ) |    |
| 1427321_s_at | CXADR   | coxsackie virus and adenovirus receptor                               | L1 |
| 1448823_at   | Cxcl12  | chemokine (C-X-C motif) ligand 12                                     |    |
| 1448859_at   | CXCL13  | chemokine (C-X-C motif) ligand 13                                     | L1 |
| 1417767_at   | CYB5B   | cytochrome b5 type B (outer mitochondrial membrane)                   | L1 |
| 1424048_a_at | CYB5R1  | cytochrome b5 reductase 1                                             | L1 |
| 1426307_at   | CYB5R4  | cytochrome b5 reductase 4                                             | L1 |
| 1449406_at   | CYHR1   | cysteine/histidine-rich 1                                             | L1 |
| 1422217_a_at | CYP1A1  | cytochrome P450, family 1, subfamily A, polypeptide 1                 | L1 |
| 1460011_at   | CYP26B1 | cytochrome P450, family 26, subfamily B, polypeptide 1                |    |
| 1425645_s_at | CYP2B6  | cytochrome P450, family 2, subfamily B, polypeptide 6                 | L1 |

|            |               |                                                                |    |
|------------|---------------|----------------------------------------------------------------|----|
| 1419040_at | Cyp2d22       | cytochrome P450, family 2, subfamily d, polypeptide 22         | L1 |
| 1458126_at | D030041H20Rik | RIKEN cDNA D030041H20 gene                                     |    |
| 1447526_at | D5Ert255e     | DNA segment, Chr 5, ERATO Doi 255, expressed                   |    |
| 1433558_at | DAB2IP        | DAB2 interacting protein                                       | L1 |
| 1417937_at | DACT1         | dapper, antagonist of beta-catenin, homolog 1 (Xenopus laevis) |    |
| 1426778_at | DAG1          | dystroglycan 1 (dystrophin-associated glycoprotein 1)          | L1 |
| 1423790_at | DAP           | death-associated protein                                       | L1 |
| 1438727_at | DCAF10        | DDB1 and CUL4 associated factor 10                             | L1 |
| 1430059_at | DCAF12        | DDB1 and CUL4 associated factor 12                             | L1 |
| 1424777_at | DCAF4         | DDB1 and CUL4 associated factor 4                              | L1 |
| 1420526_at | DCBLD2        | discoidin, CUB and LCCL domain containing 2                    | L1 |

|              |         |                                                              |    |
|--------------|---------|--------------------------------------------------------------|----|
| 1433606_at   | DCP1A   | DCP1 decapping enzyme homolog A<br>( <i>S. cerevisiae</i> )  | L1 |
| 1422521_at   | DCTN1   | dynactin 1                                                   | L1 |
| 1420862_at   | DCTN4   | dynactin 4 (p62)                                             | L1 |
| 1429094_at   | DDI2    | DNA-damage inducible 1 homolog 2<br>( <i>S. cerevisiae</i> ) |    |
| 1416071_at   | DDX18   | DEAD (Asp-Glu-Ala-Asp) box<br>polypeptide 18                 | L1 |
| 1416751_a_at | DDX20   | DEAD (Asp-Glu-Ala-Asp) box<br>polypeptide 20                 | L1 |
| 1423643_at   | DDX39A  | DEAD (Asp-Glu-Ala-Asp) box<br>polypeptide 39A                | L1 |
| 1423814_at   | DDX41   | DEAD (Asp-Glu-Ala-Asp) box<br>polypeptide 41                 | L1 |
| 1447789_x_at | DDX6    | DEAD (Asp-Glu-Ala-Asp) box helicase<br>6                     | L1 |
| 1451777_at   | DDX60   | DEAD (Asp-Glu-Ala-Asp) box<br>polypeptide 60                 | L1 |
| 1423345_at   | DEGS1   | delta(4)-desaturase, sphingolipid 1                          | L1 |
| 1430406_at   | DENND1B | DENN/MADD domain containing 1B                               | L1 |

|              |        |                                                                             |    |
|--------------|--------|-----------------------------------------------------------------------------|----|
| 1428622_at   | DEPTOR | DEP domain containing MTOR-interacting protein                              | L1 |
| 1443579_s_at | DEPTOR | DEP domain containing MTOR-interacting protein                              | L1 |
| 1451348_at   | DEPTOR | DEP domain containing MTOR-interacting protein                              | L1 |
| 1433563_s_at | DERL1  | derlin 1                                                                    | L1 |
| 1437051_at   | DFFB   | DNA fragmentation factor, 40kDa, beta polypeptide (caspase-activated DNase) |    |
| 1426738_at   | DGKZ   | diacylglycerol kinase, zeta                                                 | L1 |
| 1434004_at   | DHPS   | deoxyhypusine synthase                                                      | L1 |
| 1416140_a_at | DHX30  | DEAH (Asp-Glu-Ala-His) box polypeptide 30                                   | L1 |
| 1452693_at   | DHX35  | DEAH (Asp-Glu-Ala-His) box polypeptide 35                                   | L1 |
| 1420769_at   | DHX58  | DEXH (Asp-Glu-X-His) box polypeptide 58                                     |    |
| 1454654_at   | DIRC2  | disrupted in renal carcinoma 2                                              | L1 |

|              |         |                                                                                  |    |
|--------------|---------|----------------------------------------------------------------------------------|----|
| 1430161_at   | DLST    | dihydrolipoamide S-succinyltransferase (E2 component of 2-oxo-glutarate complex) |    |
| 1437775_at   | DLST    | dihydrolipoamide S-succinyltransferase (E2 component of 2-oxo-glutarate complex) | L1 |
| 1421544_at   | DNAH11  | dynein, axonemal, heavy chain 11                                                 | L1 |
| 1416756_at   | DNAJB1  | DnaJ (Hsp40) homolog, subfamily B, member 1                                      | L1 |
| 1447055_at   | DNAJC11 | DnaJ (Hsp40) homolog, subfamily C, member 11                                     | L1 |
| 1445337_at   | DNAJC13 | DnaJ (Hsp40) homolog, subfamily C, member 13                                     | L1 |
| 1420220_x_at | DNAJC21 | DnaJ (Hsp40) homolog, subfamily C, member 21                                     | L1 |
| 1451389_at   | DNAJC24 | DnaJ (Hsp40) homolog, subfamily C, member 24                                     | L1 |
| 1435117_a_at | DNAJC27 | DnaJ (Hsp40) homolog, subfamily C, member 27                                     |    |

|              |         |                                                                                                               |    |
|--------------|---------|---------------------------------------------------------------------------------------------------------------|----|
| 1425035_s_at | DNMT3L  | DNA (cytosine-5-)-methyltransferase 3-like                                                                    |    |
| 1427881_at   | DNTTIP2 | deoxynucleotidyltransferase, terminal, interacting protein 2                                                  | L1 |
| 1427240_at   | DOCK6   | dedicator of cytokinesis 6                                                                                    | L1 |
| 1426739_at   | DONSON  | downstream neighbor of SON                                                                                    | L1 |
| 1448549_a_at | DPAGT1  | dolichyl-phosphate (UDP-N-acetylglucosamine) N-acetylglucosaminephosphotransferase 1 (GlcNAc-1-P transferase) | L1 |
| 1428656_at   | DROSHA  | drosha, ribonuclease type III                                                                                 | L1 |
| 1421276_a_at | DST     | dystonin                                                                                                      | L1 |
| 1417124_at   | DSTN    | destrin (actin depolymerizing factor)                                                                         | L1 |
| 1438096_a_at | DTYMK   | deoxythymidylate kinase (thymidylate kinase)                                                                  |    |
| 1424066_at   | DUS3L   | dihydrouridine synthase 3-like (S. cerevisiae)                                                                | L1 |
| 1459805_x_at | DUS3L   | dihydrouridine synthase 3-like (S. cerevisiae)                                                                | L1 |

|              |               |                                                         |    |
|--------------|---------------|---------------------------------------------------------|----|
| 1450698_at   | DUSP2         | dual specificity phosphatase 2                          | L1 |
| 1428834_at   | DUSP4         | dual specificity phosphatase 4                          | L1 |
| 1450978_at   | DVL1          | dishevelled, dsh homolog 1<br>(Drosophila)              | L1 |
| 1434723_at   | E130307A14Rik | RIKEN cDNA E130307A14 gene                              |    |
| 1417444_at   | E2F5          | E2F transcription factor 5, p130-<br>binding            | L1 |
| 1433555_at   | EAF1          | ELL associated factor 1                                 | L1 |
| 1416302_at   | EBF1          | early B-cell factor 1                                   | L1 |
| 1455741_a_at | ECE1          | endothelin converting enzyme 1                          | L1 |
| 1419638_at   | EFNB2         | ephrin-B2                                               | L1 |
| 1416131_s_at | EFR3A         | EFR3 homolog A ( <i>S. cerevisiae</i> )                 | L1 |
| 1416557_a_at | EFTUD2        | elongation factor Tu GTP binding<br>domain containing 2 | L1 |
| 1438835_a_at | EFTUD2        | elongation factor Tu GTP binding<br>domain containing 2 | L1 |
| 1434647_at   | EGFLAM        | EGF-like, fibronectin type III and<br>laminin G domains | L1 |

|              |          |                                                               |    |
|--------------|----------|---------------------------------------------------------------|----|
| 1418649_at   | EGLN3    | egl nine homolog 3 ( <i>C. elegans</i> )                      |    |
| 1449852_a_at | EHD4     | EH-domain containing 4                                        | L1 |
| 1460692_at   | EHMT2    | euchromatic histone-lysine N-methyltransferase 2              | L1 |
| 1429350_at   | EID3     | EP300 interacting inhibitor of differentiation 3              | L1 |
| 1422005_at   | EIF2AK2  | eukaryotic translation initiation factor 2-alpha kinase 2     |    |
| 1441063_at   | EIF2C3   | eukaryotic translation initiation factor 2C, 3                |    |
| 1455575_at   | EIF4EBP2 | eukaryotic translation initiation factor 4E binding protein 2 | L1 |
| 1426833_at   | EIF4G3   | eukaryotic translation initiation factor 4 gamma, 3           | L1 |
| 1451521_x_at | EIF4H    | eukaryotic translation initiation factor 4H                   | L1 |
| 1434605_at   | EIF5B    | eukaryotic translation initiation factor 5B                   |    |



|              |         |                                                     |    |
|--------------|---------|-----------------------------------------------------|----|
| 1428045_a_at | ELF2    | E74-like factor 2 (ets domain transcription factor) |    |
| 1456098_a_at | ELMO2   | engulfment and cell motility 2                      | L1 |
| 1434489_at   | ELMO3   | engulfment and cell motility 3                      |    |
| 1415774_at   | ELP2    | elongator acetyltransferase complex subunit 2       | L1 |
| 1448882_at   | EMC6    | ER membrane protein complex subunit 6               | L1 |
| 1435264_at   | EMILIN2 | elastin microfibril interfacier 2                   | L1 |
| 1423705_at   | ENOPH1  | enolase-phosphatase 1                               | L1 |
| 1441630_at   | EP400   | E1A binding protein p400                            |    |
| 1426860_at   | EP400   | E1A binding protein p400                            | L1 |
| 1447349_s_at | EP400   | E1A binding protein p400                            | L1 |
| 1459619_at   | EPB41L2 | erythrocyte membrane protein band 4.1-like 2        | L1 |
| 1419062_at   | EPB41L3 | erythrocyte membrane protein band 4.1-like 3        |    |
| 1421815_at   | EPDR1   | ependymin related protein 1 (zebrafish)             | L1 |

|              |          |                                                             |    |
|--------------|----------|-------------------------------------------------------------|----|
| 1428419_at   | EPG5     | ectopic P-granules autophagy protein 5 homolog (C. elegans) |    |
| 1421151_a_at | EPHA2    | EPH receptor A2                                             |    |
| 1452158_at   | EPRS     | glutamyl-prolyl-tRNA synthetase                             | L1 |
| 1441604_at   | ESD      | esterase D                                                  | L1 |
| 1451142_at   | EXOC1    | exocyst complex component 1                                 | L1 |
| 1422684_a_at | EXOC4    | exocyst complex component 4                                 |    |
| 1460679_at   | EXOSC4   | exosome component 4                                         | L1 |
| 1418290_a_at | EZH1     | enhancer of zeste homolog 1 (Drosophila)                    |    |
| 1437308_s_at | F2R      | coagulation factor II (thrombin) receptor                   | L1 |
| 1426893_at   | FAM102A  | family with sequence similarity 102, member A               | L1 |
| 1436229_at   | FAM126B  | family with sequence similarity 126, member B               | L1 |
| 1455793_at   | FAM149A  | family with sequence similarity 149, member A               | L1 |
| 1434269_at   | FAM149B1 | family with sequence similarity 149, member B1              | L1 |

|            |               |                                                   |    |
|------------|---------------|---------------------------------------------------|----|
| 1435686_at | FAM149B1      | family with sequence similarity 149,<br>member B1 | L1 |
| 1453284_at | FAM151B       | family with sequence similarity 151,<br>member B  | L1 |
| 1417402_at | Fam165b       | family with sequence similarity 165,<br>member B  | L1 |
| 1419170_at | FAM174A       | family with sequence similarity 174,<br>member A  | L1 |
| 1417688_at | FAM20C        | family with sequence similarity 20,<br>member C   |    |
| 1436150_at | FAM219A       | family with sequence similarity 219,<br>member A  |    |
| 1433588_at | FAM21A/FAM21C | family with sequence similarity 21,<br>member C   | L1 |
| 1454644_at | FAM40A        | family with sequence similarity 40,<br>member A   | L1 |
| 1443747_at | FAM48A        | family with sequence similarity 48,<br>member A   | L1 |
| 1428874_at | FAM96B        | family with sequence similarity 96,<br>member B   | L1 |

|              |        |                                                                             |    |
|--------------|--------|-----------------------------------------------------------------------------|----|
| 1452280_at   | FARP1  | FERM, RhoGEF (ARHGEF) and pleckstrin domain protein 1 (chondrocyte-derived) | L1 |
| 1460251_at   | FAS    | Fas (TNF receptor superfamily, member 6)                                    | L1 |
| 1460635_at   | FASTK  | Fas-activated serine/threonine kinase                                       | L1 |
| 1459749_s_at | FAT4   | FAT tumor suppressor homolog 4 (Drosophila)                                 |    |
| 1452860_at   | FBXL17 | F-box and leucine-rich repeat protein 17                                    | L1 |
| 1418419_at   | FBXL20 | F-box and leucine-rich repeat protein 20                                    | L1 |
| 1448747_at   | FBXO32 | F-box protein 32                                                            |    |
| 1427121_at   | FBXO4  | F-box protein 4                                                             | L1 |
| 1418323_at   | FEM1B  | fem-1 homolog b (C. elegans)                                                | L1 |
| 1455337_at   | FGD4   | FYVE, RhoGEF and PH domain containing 4                                     |    |
| 1439959_at   | FGF11  | fibroblast growth factor 11                                                 |    |
| 1424050_s_at | FGFR1  | fibroblast growth factor receptor 1                                         |    |

|              |         |                                                         |    |
|--------------|---------|---------------------------------------------------------|----|
| 1451912_a_at | FGFRL1  | fibroblast growth factor receptor-like 1                | L1 |
| 1416044_at   | FLII    | flightless I homolog (Drosophila)                       | L1 |
| 1448189_a_at | FLII    | flightless I homolog (Drosophila)                       | L1 |
| 1442107_at   | FLNB    | filamin B, beta                                         |    |
| 1417544_a_at | FLOT2   | flotillin 2                                             | L1 |
| 1434414_at   | FOXRED2 | FAD-dependent oxidoreductase domain containing 2        |    |
| 1423681_at   | FTSJD2  | FtsJ methyltransferase domain containing 2              | L1 |
| 1437544_at   | FUBP1   | far upstream element (FUSE) binding protein 1           |    |
| 1419761_a_at | GABPB1  | GA binding protein transcription factor, beta subunit 1 |    |
| 1440868_at   | GABPB2  | GA binding protein transcription factor, beta subunit 2 |    |

|              |         |                                                                                                  |    |
|--------------|---------|--------------------------------------------------------------------------------------------------|----|
| 1418194_at   | GALNT10 | UDP-N-acetyl-alpha-D-galactosamine:polypeptide N-acetylgalactosaminyltransferase 10 (GalNAc-T10) | L1 |
| 1422558_at   | GAMT    | guanidinoacetate N-methyltransferase                                                             |    |
| 1415787_at   | GANAB   | glucosidase, alpha; neutral AB                                                                   | L1 |
| 1436385_at   | GANC    | glucosidase, alpha; neutral C                                                                    | L1 |
| 1425599_a_at | GATAD1  | GATA zinc finger domain containing 1                                                             | L1 |
| 1423992_at   | GATAD2A | GATA zinc finger domain containing 2A                                                            | L1 |
| 1419484_a_at | GBAS    | glioblastoma amplified sequence                                                                  |    |
| 1420654_a_at | GBE1    | glucan (1,4-alpha-), branching enzyme 1                                                          | L1 |
| 1418627_at   | GCLM    | glutamate-cysteine ligase, modifier subunit                                                      | L1 |
| 1439050_at   | GCLM    | glutamate-cysteine ligase, modifier subunit                                                      | L1 |
| 1455180_at   | GCOM1   | GRINL1A complex locus 1                                                                          | L1 |

|              |               |                                                                             |    |
|--------------|---------------|-----------------------------------------------------------------------------|----|
| 1423554_at   | GGCX          | gamma-glutamyl carboxylase                                                  | L1 |
| 1419595_a_at | GGH           | gamma-glutamyl hydrolase<br>(conjugase, foylpolygammaglutamyl<br>hydrolase) | L1 |
| 1419502_at   | GHDC          | GH3 domain containing                                                       | L1 |
| 1428713_s_at | GINS2         | GINS complex subunit 2 (Psf2<br>homolog)                                    |    |
| 1447787_x_at | GJC1          | gap junction protein, gamma 1, 45kDa                                        | L1 |
| 1430385_a_at | GLB1L         | galactosidase, beta 1-like                                                  | L1 |
| 1433728_at   | GLB1L2        | galactosidase, beta 1-like 2                                                |    |
| 1451972_at   | GLCCI1        | glucocorticoid induced transcript 1                                         | L1 |
| 1452033_at   | GLE1          | GLE1 RNA export mediator homolog<br>(yeast)                                 | L1 |
| 1428270_at   | GLT8D1        | glycosyltransferase 8 domain<br>containing 1                                | L1 |
| 1419443_at   | Gm10094/Sap18 | Sin3-associated polypeptide 18                                              | L1 |
| 1436265_at   | Gm10419       | predicted gene 10419                                                        | L1 |
| 1430285_at   | Gm14057       | Ppp1r14c pseudogene                                                         |    |

|              |         |                                                                     |    |
|--------------|---------|---------------------------------------------------------------------|----|
| 1456547_at   | Gm19313 | predicted gene, 19313                                               | L1 |
| 1441233_at   | Gm19858 | predicted gene, 19858                                               | L1 |
| 1420304_x_at | Gm19974 | predicted gene, 19974                                               | L1 |
| 1460021_at   | Gm6658  | predicted gene 6658                                                 |    |
| 1446470_at   | Gm9799  | predicted gene 9799                                                 | L1 |
| 1447246_at   | Gm9873  | predicted gene 9873                                                 | L1 |
| 1417069_a_at | GMFB    | glia maturation factor, beta                                        |    |
| 1434254_at   | GNA11   | guanine nucleotide binding protein (G protein), alpha 11 (Gq class) | L1 |
| 1426579_at   | GNL2    | guanine nucleotide binding protein-like 2 (nucleolar)               | L1 |
| 1437566_at   | GNL2    | guanine nucleotide binding protein-like 2 (nucleolar)               | L1 |
| 1423157_at   | GNPNAT1 | glucosamine-phosphate N-acetyltransferase 1                         | L1 |
| 1436526_at   | GNPTG   | N-acetylglucosamine-1-phosphate transferase, gamma subunit          | L1 |
| 1424385_at   | GON4L   | gon-4-like (C. elegans)                                             | L1 |



|              |         |                                                                             |    |
|--------------|---------|-----------------------------------------------------------------------------|----|
| 1458365_at   | GORAB   | golgin, RAB6-interacting                                                    | L1 |
| 1451671_at   | GORASP1 | golgi reassembly stacking protein 1, 65kDa                                  | L1 |
| 1450970_at   | GOT1    | glutamic-oxaloacetic transaminase 1, soluble (aspartate aminotransferase 1) | L1 |
| 1437417_s_at | GPC6    | glypican 6                                                                  | L1 |
| 1434344_at   | GPKOW   | G patch domain and KOW motifs                                               | L1 |
| 1418379_s_at | GPR124  | G protein-coupled receptor 124                                              | L1 |
| 1417245_at   | GPR180  | G protein-coupled receptor 180                                              | L1 |
| 1415699_a_at | GPS1    | G protein pathway suppressor 1                                              | L1 |
| 1441894_s_at | GRASP   | GRP1 (general receptor for phosphoinositides 1)-associated scaffold protein |    |
| 1424030_at   | GRHL1   | grainyhead-like 1 (Drosophila)                                              |    |
| 1427046_at   | GRHL2   | grainyhead-like 2 (Drosophila)                                              | L1 |

|              |        |                                                                  |    |
|--------------|--------|------------------------------------------------------------------|----|
| 1420563_at   | GRIA3  | glutamate receptor, ionotropic, AMPA<br>3                        |    |
| 1451672_at   | GRK6   | G protein-coupled receptor kinase 6                              | L1 |
| 1433457_s_at | GRSF1  | G-rich RNA sequence binding factor 1                             | L1 |
| 1439931_at   | GSK3B  | glycogen synthase kinase 3 beta                                  |    |
| 1434568_at   | GTF3C6 | general transcription factor IIIC,<br>polypeptide 6, alpha 35kDa | L1 |
| 1416690_at   | GTPBP2 | GTP binding protein 2                                            | L1 |
| 1423878_at   | GYPC   | glycophorin C (Gerbich blood group)                              | L1 |
| 1424771_at   | H2AFJ  | H2A histone family, member J                                     | L1 |
| 1451229_at   | HDAC11 | histone deacetylase 11                                           | L1 |
| 1448928_at   | HDAC6  | histone deacetylase 6                                            | L1 |
| 1449615_s_at | HDLBP  | high density lipoprotein binding protein                         | L1 |
| 1435013_at   | HEATR2 | HEAT repeat containing 2                                         | L1 |
| 1437970_at   | HEATR2 | HEAT repeat containing 2                                         | L1 |

|              |        |                                                                            |    |
|--------------|--------|----------------------------------------------------------------------------|----|
| 1424141_at   | HECTD1 | HECT domain containing E3 ubiquitin protein ligase 1                       | L1 |
| 1433524_at   | HECTD4 | HECT domain containing E3 ubiquitin protein ligase 4                       |    |
| 1434060_at   | HERC1  | HECT and RLD domain containing E3 ubiquitin protein ligase family member 1 | L1 |
| 1444228_s_at | HERC2  | HECT and RLD domain containing E3 ubiquitin protein ligase 2               |    |
| 1434844_at   | HEXDC  | hexosaminidase (glycosyl hydrolase family 20, catalytic domain) containing |    |
| 1448359_a_at | Higd1a | HIG1 domain family, member 1A                                              | L1 |
| 1448512_at   | HILS1  | histone linker H1 domain, spermatid-specific 1, pseudogene                 | L1 |
| 1434557_at   | HIP1   | huntingtin interacting protein 1                                           | L1 |

|              |                           |                                                                |    |
|--------------|---------------------------|----------------------------------------------------------------|----|
| 1429566_a_at | HIPK2                     | homeodomain interacting protein kinase 2                       | L1 |
| 1456022_at   | HIPK2                     | homeodomain interacting protein kinase 2                       | L1 |
| 1419191_at   | HIPK3                     | homeodomain interacting protein kinase 3                       | L1 |
| 1422948_s_at | Hist2h4 (includes others) | histone cluster 2, H4                                          | L1 |
| 1458802_at   | HIVEP3                    | human immunodeficiency virus type I enhancer binding protein 3 |    |
| 1417637_a_at | HMG20B                    | high mobility group 20B                                        | L1 |
| 1448239_at   | HMOX1                     | heme oxygenase (decycling) 1                                   | L1 |
| 1452030_a_at | HNRNPR                    | heterogeneous nuclear ribonucleoprotein R                      | L1 |
| 1419350_at   | HOOK2                     | hook homolog 2 (Drosophila)                                    |    |
| 1439196_at   | HOOK3                     | hook homolog 3 (Drosophila)                                    | L1 |
| 1427362_x_at | HOXC6                     | homeobox C6                                                    | L1 |
| 1450647_at   | HPS3                      | Hermansky-Pudlak syndrome 3                                    |    |
| 1434677_at   | HPS5                      | Hermansky-Pudlak syndrome 5                                    | L1 |

|              |         |                                                                           |    |
|--------------|---------|---------------------------------------------------------------------------|----|
| 1449038_at   | HSD11B1 | hydroxysteroid (11-beta)<br>dehydrogenase 1                               |    |
| 1424622_at   | HSF1    | heat shock transcription factor 1                                         | L1 |
| 1434051_s_at | HSPA12A | heat shock 70kDa protein 12A                                              | L1 |
| 1458385_at   | HSPA4L  | heat shock 70kDa protein 4-like                                           |    |
| 1447824_x_at | HSPA5   | heat shock 70kDa protein 5 (glucose-<br>regulated protein, 78kDa)         | L1 |
| 1427029_at   | HTRA3   | HtrA serine peptidase 3                                                   | L1 |
| 1415703_at   | HUWE1   | HECT, UBA and WWE domain<br>containing 1, E3 ubiquitin protein<br>ligase  | L1 |
| 1443183_at   | HUWE1   | HECT, UBA and WWE domain<br>containing 1, E3 ubiquitin protein<br>ligase  | L1 |
| 1452154_at   | IARS    | isoleucyl-tRNA synthetase                                                 | L1 |
| 1423259_at   | ID4     | inhibitor of DNA binding 4, dominant<br>negative helix-loop-helix protein |    |

|              |         |                                                                 |    |
|--------------|---------|-----------------------------------------------------------------|----|
| 1441271_at   | IDH3B   | isocitrate dehydrogenase 3 (NAD+) beta                          | L1 |
| 1454628_at   | IFFO1   | intermediate filament family orphan 1                           | L1 |
| 1451462_a_at | IFNAR2  | interferon (alpha, beta and omega) receptor 2                   | L1 |
| 1424648_at   | IFT27   | intraflagellar transport 27 homolog (Chlamydomonas)             | L1 |
| 1434299_x_at | IFT27   | intraflagellar transport 27 homolog (Chlamydomonas)             | L1 |
| 1439764_s_at | IGF2BP2 | insulin-like growth factor 2 mRNA binding protein 2             |    |
| 1440979_at   | IGF2R   | insulin-like growth factor 2 receptor                           | L1 |
| 1422826_at   | IGFALS  | insulin-like growth factor binding protein, acid labile subunit | L1 |
| 1458268_s_at | IGFBP3  | insulin-like growth factor binding protein 3                    | L1 |
| 1437804_at   | IGFBP7  | insulin-like growth factor binding protein 7                    |    |

|              |        |                                                                                           |    |
|--------------|--------|-------------------------------------------------------------------------------------------|----|
| 1423584_at   | IGFBP7 | insulin-like growth factor binding protein 7                                              | L1 |
| 1425763_x_at | IGHA1  | immunoglobulin heavy constant alpha 1                                                     |    |
| 1427329_a_at | IGHM   | immunoglobulin heavy constant mu                                                          | L1 |
| 1427351_s_at | IGHM   | immunoglobulin heavy constant mu                                                          | L1 |
| 1424305_at   | IGJ    | immunoglobulin J polypeptide, linker protein for immunoglobulin alpha and mu polypeptides |    |
| 1452557_a_at | Igk    | immunoglobulin kappa chain complex                                                        |    |
| 1429065_at   | IKBIP  | IKBKB interacting protein                                                                 | L1 |
| 1418219_at   | IL15   | interleukin 15                                                                            | L1 |
| 1448681_at   | IL15RA | interleukin 15 receptor, alpha                                                            |    |
| 1435714_x_at | IL17D  | interleukin 17D                                                                           | L1 |
| 1420904_at   | IL17RA | interleukin 17 receptor A                                                                 | L1 |
| 1420905_at   | IL17RA | interleukin 17 receptor A                                                                 | L1 |
| 1449942_a_at | ILK    | integrin-linked kinase                                                                    | L1 |

|              |        |                                              |    |
|--------------|--------|----------------------------------------------|----|
| 1454658_at   | ILVBL  | ilvB (bacterial acetolactate synthase)-like  | L1 |
| 1423229_at   | INPP5E | inositol polyphosphate-5-phosphatase, 72 kDa | L1 |
| 1442100_at   | INPP5F | inositol polyphosphate-5-phosphatase F       | L1 |
| 1460394_a_at | INPPL1 | inositol polyphosphate phosphatase-like 1    | L1 |
| 1426943_at   | INTS1  | integrator complex subunit 1                 | L1 |
| 1448668_a_at | IRAK1  | interleukin-1 receptor-associated kinase 1   | L1 |
| 1435040_at   | IRAK3  | interleukin-1 receptor-associated kinase 3   | L1 |
| 1430316_at   | ISPD   | isoprenoid synthase domain containing        |    |
| 1423837_at   | IST1   | increased sodium tolerance 1 homolog (yeast) | L1 |
| 1423838_s_at | IST1   | increased sodium tolerance 1 homolog (yeast) | L1 |



|              |        |                                                                      |    |
|--------------|--------|----------------------------------------------------------------------|----|
| 1415977_at   | ISYNA1 | inositol-3-phosphate synthase 1                                      | L1 |
| 1456498_at   | ITGA4  | integrin, alpha 4 (antigen CD49D, alpha 4 subunit of VLA-4 receptor) |    |
| 1450029_s_at | ITGA9  | integrin, alpha 9                                                    | L1 |
| 1417279_at   | ITPR1  | inositol 1,4,5-trisphosphate receptor, type 1                        | L1 |
| 1427287_s_at | ITPR2  | inositol 1,4,5-trisphosphate receptor, type 2                        | L1 |
| 1425899_a_at | ITSN1  | intersectin 1 (SH3 domain protein)                                   | L1 |
| 1433805_at   | JAK1   | Janus kinase 1                                                       | L1 |
| 1460577_at   | JMY    | junction mediating and regulatory protein, p53 cofactor              | L1 |
| 1433742_at   | KANK1  | KN motif and ankyrin repeat domains<br>1                             | L1 |
| 1438400_at   | KANSL3 | KAT8 regulatory NSL complex subunit<br>3                             | L1 |
| 1433433_at   | KAT7   | K(lysine) acetyltransferase 7                                        | L1 |

|            |          |                                                                   |    |
|------------|----------|-------------------------------------------------------------------|----|
| 1423179_at | KCNB1    | potassium voltage-gated channel, Shab-related subfamily, member 1 | L1 |
| 1418142_at | KCNJ8    | potassium inwardly-rectifying channel, subfamily J, member 8      | L1 |
| 1449158_at | KCNK2    | potassium channel, subfamily K, member 2                          |    |
| 1425341_at | KCNK3    | potassium channel, subfamily K, member 3                          | L1 |
| 1440355_at | Kctd12b  | potassium channel tetramerisation domain containing 12b           | L1 |
| 1435525_at | KCTD17   | potassium channel tetramerisation domain containing 17            | L1 |
| 1448302_at | KCTD20   | potassium channel tetramerisation domain containing 20            | L1 |
| 1436811_at | KCTD3    | potassium channel tetramerisation domain containing 3             | L1 |
| 1439691_at | KIAA0232 | KIAA0232                                                          |    |
| 1454721_at | KIAA0317 | KIAA0317                                                          | L1 |

|              |          |                                                                 |    |
|--------------|----------|-----------------------------------------------------------------|----|
| 1427978_at   | KIAA0494 | KIAA0494                                                        | L1 |
| 1427319_at   | KIAA1033 | KIAA1033                                                        |    |
| 1457678_at   | KIAA1468 | KIAA1468                                                        |    |
| 1424913_at   | KIAA1737 | KIAA1737                                                        | L1 |
| 1447853_x_at | KIF13A   | kinesin family member 13A                                       |    |
| 1423995_at   | KIF1B    | kinesin family member 1B                                        | L1 |
| 1417395_at   | KLF4     | Kruppel-like factor 4 (gut)                                     | L1 |
| 1418280_at   | KLF6     | Kruppel-like factor 6                                           |    |
| 1460678_at   | KLHDC2   | kelch domain containing 2                                       | L1 |
| 1455910_at   | KLHDC3   | kelch domain containing 3                                       |    |
| 1428081_at   | KLHL21   | kelch-like 21 (Drosophila)                                      | L1 |
| 1426481_at   | KLHL22   | kelch-like 22 (Drosophila)                                      | L1 |
| 1417975_at   | KPNA4    | karyopherin alpha 4 (importin alpha 3)                          |    |
| 1416925_at   | KPNB1    | karyopherin (importin) beta 1                                   | L1 |
| 1435472_at   | KREMEN1  | kringle containing transmembrane protein 1                      | L1 |
| 1428084_at   | KRR1     | KRR1, small subunit (SSU) processome component, homolog (yeast) | L1 |
| 1427352_at   | KRT79    | keratin 79                                                      |    |
| 1460185_at   | KRT85    | keratin 85                                                      | L1 |

|              |         |                                                                 |    |
|--------------|---------|-----------------------------------------------------------------|----|
| 1416106_at   | KTI12   | KTI12 homolog, chromatin associated<br>( <i>S. cerevisiae</i> ) | L1 |
| 1427073_at   | LACE1   | lactation elevated 1                                            | L1 |
| 1424808_at   | LAMA4   | laminin, alpha 4                                                |    |
| 1416513_at   | LAMB2   | laminin, beta 2 (laminin S)                                     | L1 |
| 1448718_at   | LAMTOR1 | late endosomal/lysosomal adaptor,<br>MAPK and MTOR activator 1  |    |
| 1428310_at   | LARP7   | La ribonucleoprotein domain family,<br>member 7                 | L1 |
| 1456309_x_at | LASP1   | LIM and SH3 protein 1                                           |    |
| 1460173_at   | LASP1   | LIM and SH3 protein 1                                           |    |
| 1417044_at   | LCMT1   | leucine carboxyl methyltransferase 1                            | L1 |
| 1452752_at   | LEPRE1  | leucine proline-enriched proteoglycan<br>(leprecan) 1           |    |
| 1421217_a_at | LGALS9  | lectin, galactoside-binding, soluble, 9                         | L1 |
| 1448883_at   | LGMN    | legumain                                                        | L1 |
| 1425094_a_at | LHX6    | LIM homeobox 6                                                  | L1 |

|              |              |                                              |    |
|--------------|--------------|----------------------------------------------|----|
| 1421207_at   | LIF          | leukemia inhibitory factor                   | L1 |
| 1425107_a_at | LIFR         | leukemia inhibitory factor receptor<br>alpha | L1 |
| 1435727_s_at | LIMA1        | LIM domain and actin binding 1               |    |
| 1450629_at   | LIMA1        | LIM domain and actin binding 1               |    |
| 1422499_at   | LIMA1        | LIM domain and actin binding 1               | L1 |
| 1416869_x_at | LIME1        | Lck interacting transmembrane<br>adaptor 1   | L1 |
| 1448500_a_at | LIME1        | Lck interacting transmembrane<br>adaptor 1   | L1 |
| 1448531_at   | LMNB2        | lamin B2                                     | L1 |
| 1420981_a_at | LMO4         | LIM domain only 4                            | L1 |
| 1438432_at   | LNPEP        | leucyl/cystinyl aminopeptidase               |    |
| 1446154_at   | LOC100047123 | uncharacterized LOC100047123                 | L1 |
| 1455465_at   | LOC100505262 | uncharacterized LOC100505262                 |    |
| 1427820_at   | LOC100861696 | uncharacterized LOC100861696                 |    |
| 1447975_a_at | LOC545261    | uncharacterized LOC545261                    | L1 |

|              |           |                                                                     |    |
|--------------|-----------|---------------------------------------------------------------------|----|
| 1442430_at   | LOC646498 | uncharacterized LOC646498                                           | L1 |
| 1460178_at   | LONP2     | lon peptidase 2, peroxisomal                                        | L1 |
| 1448606_at   | LPAR1     | lysophosphatidic acid receptor 1                                    |    |
| 1431056_a_at | LPL       | lipoprotein lipase                                                  | L1 |
| 1454756_at   | LRCH3     | leucine-rich repeats and calponin homology (CH) domain containing 3 | L1 |
| 1416836_at   | LRP10     | low density lipoprotein receptor-related protein 10                 | L1 |
| 1433536_at   | LRP11     | low density lipoprotein receptor-related protein 11                 | L1 |
| 1451022_at   | LRP6      | low density lipoprotein receptor-related protein 6                  |    |
| 1424353_at   | LRPPRC    | leucine-rich pentatricopeptide repeat containing                    | L1 |
| 1435648_at   | LRRN4     | leucine rich repeat neuronal 4                                      | L1 |
| 1429176_at   | LRSAM1    | leucine rich repeat and sterile alpha motif containing 1            | L1 |

|              |           |                                                                      |    |
|--------------|-----------|----------------------------------------------------------------------|----|
| 1425548_a_at | Lst1      | leukocyte specific transcript 1                                      | L1 |
| 1426813_at   | LTV1      | LTV1 homolog (S. cerevisiae)                                         | L1 |
| 1452708_a_at | LUC7L     | LUC7-like (S. cerevisiae)                                            |    |
| 1427087_at   | LUC7L2    | LUC7-like 2 (S. cerevisiae)                                          |    |
| 1428384_at   | LURAP1L   | leucine rich adaptor protein 1-like                                  | L1 |
| 1423547_at   | Lyz1/Lyz2 | lysozyme 2                                                           | L1 |
| 1450927_at   | LZTR1     | leucine-zipper-like transcription regulator 1                        | L1 |
| 1423031_at   | MAEA      | macrophage erythroblast attacher                                     | L1 |
| 1451716_at   | MAFB      | v-maf musculoaponeurotic fibrosarcoma oncogene homolog B (avian)     | L1 |
| 1426306_a_at | MAGED2    | melanoma antigen family D, 2                                         | L1 |
| 1422431_at   | MAGEE1    | melanoma antigen family E, 1                                         | L1 |
| 1454855_at   | MAGI2     | membrane associated guanylate kinase, WW and PDZ domain containing 2 | L1 |

|              |          |                                                                             |    |
|--------------|----------|-----------------------------------------------------------------------------|----|
| 1418188_a_at | MALAT1   | metastasis associated lung adenocarcinoma transcript 1 (non-protein coding) |    |
| 1418189_s_at | MALAT1   | metastasis associated lung adenocarcinoma transcript 1 (non-protein coding) |    |
| 1452378_at   | MALAT1   | metastasis associated lung adenocarcinoma transcript 1 (non-protein coding) |    |
| 1438403_s_at | MALAT1   | metastasis associated lung adenocarcinoma transcript 1 (non-protein coding) | L1 |
| 1417110_at   | MAN1A1   | mannosidase, alpha, class 1A, member 1                                      |    |
| 1417111_at   | MAN1A1   | mannosidase, alpha, class 1A, member 1                                      | L1 |
| 1456534_at   | MAN1A2   | mannosidase, alpha, class 1A, member 2                                      |    |
| 1428024_at   | MAP1LC3B | microtubule-associated protein 1 light chain 3 beta                         | L1 |



|              |          |                                                                 |    |
|--------------|----------|-----------------------------------------------------------------|----|
| 1451714_a_at | MAP2K3   | mitogen-activated protein kinase<br>kinase 3                    | L1 |
| 1425512_at   | MAP2K7   | mitogen-activated protein kinase<br>kinase 7                    | L1 |
| 1439467_at   | MAP4     | microtubule-associated protein 4                                |    |
| 1422615_at   | MAP4K4   | mitogen-activated protein kinase<br>kinase kinase kinase 4      | L1 |
| 1422550_a_at | MAP6     | microtubule-associated protein 6                                |    |
| 1457316_at   | MAP6     | microtubule-associated protein 6                                |    |
| 1425679_a_at | MAPK8IP1 | mitogen-activated protein kinase 8<br>interacting protein 1     |    |
| 1425975_a_at | MAPK8IP3 | mitogen-activated protein kinase 8<br>interacting protein 3     | L1 |
| 1426648_at   | MAPKAPK2 | mitogen-activated protein kinase-<br>activated protein kinase 2 | L1 |
| 1437494_at   | MAPKAPK3 | mitogen-activated protein kinase-<br>activated protein kinase 3 | L1 |

|            |          |                                                                   |    |
|------------|----------|-------------------------------------------------------------------|----|
| 1417016_at | MAPKAPK5 | mitogen-activated protein kinase-activated protein kinase 5       | L1 |
| 1422765_at | MAPRE1   | microtubule-associated protein, RP/EB family, member 1            |    |
| 1428820_at | MAPRE1   | microtubule-associated protein, RP/EB family, member 1            |    |
| 1442553_at | MAPRE2   | microtubule-associated protein, RP/EB family, member 2            | L1 |
| 1419442_at | MATN2    | matrilin 2                                                        | L1 |
| 1440299_at | MB21D1   | Mab-21 domain containing 1                                        |    |
| 1441388_at | MBD2     | methyl-CpG binding domain protein 2                               | L1 |
| 1437704_at | MBLAC2   | metallo-beta-lactamase domain containing 2                        | L1 |
| 1457924_at | MBNL1    | muscleblind-like splicing regulator 1                             | L1 |
| 1448711_at | MCM3AP   | minichromosome maintenance complex component 3 associated protein | L1 |

|              |         |                                                    |    |
|--------------|---------|----------------------------------------------------|----|
| 1455117_at   | MCM9    | minichromosome maintenance complex component 9     | L1 |
| 1424348_at   | MCMBP   | minichromosome maintenance complex binding protein | L1 |
| 1416671_a_at | MCOLN1  | mucolipin 1                                        | L1 |
| 1416535_at   | MCRS1   | microspherule protein 1                            | L1 |
| 1451058_at   | Mcts2   | malignant T cell amplified sequence 2              | L1 |
| 1458223_at   | MDM4    | Mdm4 p53 binding protein homolog (mouse)           | L1 |
| 1426572_at   | ME2     | malic enzyme 2, NAD(+)-dependent, mitochondrial    | L1 |
| 1425585_at   | MED12   | mediator complex subunit 12                        | L1 |
| 1436904_at   | MED13   | mediator complex subunit 13                        |    |
| 1448435_at   | MED15   | mediator complex subunit 15                        | L1 |
| 1425473_at   | MED17   | mediator complex subunit 17                        | L1 |
| 1417129_a_at | MEIS2   | Meis homeobox 2                                    | L1 |
| 1428582_at   | METTL10 | methyltransferase like 10                          | L1 |
| 1452950_at   | METTL15 | methyltransferase like 15                          | L1 |

|              |         |                                                                            |    |
|--------------|---------|----------------------------------------------------------------------------|----|
| 1434749_at   | METTL25 | methyltransferase like 25                                                  |    |
| 1417710_at   | METTL9  | methyltransferase like 9                                                   | L1 |
| 1451572_a_at | MFF     | mitochondrial fission factor                                               | L1 |
| 1452335_at   | MFSD8   | major facilitator superfamily domain containing 8                          | L1 |
| 1452037_at   | MGAT2   | mannosyl (alpha-1,6)-glycoprotein beta-1,2-N-acetylglucosaminyltransferase | L1 |
| 1431331_at   | MGLL    | monoglyceride lipase                                                       |    |
| 1454645_at   | MGRN1   | mahogunin ring finger 1, E3 ubiquitin protein ligase                       | L1 |
| 1459984_at   | MIA3    | melanoma inhibitory activity family, member 3                              |    |
| 1438726_at   | MICAL2  | microtubule associated monooxygenase, calponin and LIM domain containing 2 | L1 |
| 1452916_at   | MLL4    | myeloid/lymphoid or mixed-lineage leukemia 4                               | L1 |
| 1441456_at   | MMP24   | matrix metalloproteinase 24 (membrane-inserted)                            | L1 |

|              |         |                                                                                        |    |
|--------------|---------|----------------------------------------------------------------------------------------|----|
| 1448291_at   | MMP9    | matrix metalloproteinase 9 (gelatinase B, 92kDa gelatinase, 92kDa type IV collagenase) | L1 |
| 1455099_at   | MOGAT2  | monoacylglycerol O-acyltransferase 2                                                   |    |
| 1449476_at   | MOK     | MOK protein kinase                                                                     |    |
| 1454158_at   | MPP7    | membrane protein, palmitoylated 7 (MAGUK p55 subfamily member 7)                       |    |
| 1451858_at   | MRGPRX3 | MAS-related GPR, member X3                                                             | L1 |
| 1450866_a_at | MRPL17  | mitochondrial ribosomal protein L17                                                    | L1 |
| 1416948_at   | MRPL23  | mitochondrial ribosomal protein L23                                                    |    |
| 1427158_at   | MRPS30  | mitochondrial ribosomal protein S30                                                    | L1 |
| 1452111_at   | MRPS35  | mitochondrial ribosomal protein S35                                                    | L1 |
| 1421230_a_at | MSI2    | musashi homolog 2 (Drosophila)                                                         | L1 |
| 1434481_at   | Msl1    | male-specific lethal 1 homolog (Drosophila)                                            | L1 |

|              |         |                                                                  |    |
|--------------|---------|------------------------------------------------------------------|----|
| 1429601_x_at | MTHFD2L | methylenetetrahydrofolate dehydrogenase (NADP+ dependent) 2-like |    |
| 1429600_at   | MTHFD2L | methylenetetrahydrofolate dehydrogenase (NADP+ dependent) 2-like | L1 |
| 1419387_s_at | MUC13   | mucin 13, cell surface associated                                | L1 |
| 1422574_at   | MXD4    | MAX dimerization protein 4                                       |    |
| 1434379_at   | MXD4    | MAX dimerization protein 4                                       | L1 |
| 1434274_at   | MYCBP2  | MYC binding protein 2, E3 ubiquitin protein ligase               |    |
| 1450651_at   | MYO10   | myosin X                                                         | L1 |
| 1451183_at   | MYO19   | myosin XIX                                                       | L1 |
| 1420426_at   | MYO7B   | myosin VIIB                                                      | L1 |
| 1436307_at   | MYO9A   | myosin IXA                                                       | L1 |
| 1417707_at   | N4BP2L1 | NEDD4 binding protein 2-like 1                                   |    |
| 1452914_at   | N4BP2L1 | NEDD4 binding protein 2-like 1                                   |    |
| 1433766_at   | NAA25   | N(alpha)-acetyltransferase 25, NatB auxiliary subunit            | L1 |

|              |         |                                                           |    |
|--------------|---------|-----------------------------------------------------------|----|
| 1415721_a_at | NAA60   | N(alpha)-acetyltransferase 60, NatF catalytic subunit     | L1 |
| 1448781_at   | NAB1    | NGFI-A binding protein 1 (EGR1 binding protein 1)         | L1 |
| 1417153_at   | NACC2   | NACC family member 2, BEN and BTB (POZ) domain containing | L1 |
| 1429582_at   | NACC2   | NACC family member 2, BEN and BTB (POZ) domain containing | L1 |
| 1430359_a_at | NADSYN1 | NAD synthetase 1                                          | L1 |
| 1448746_at   | NBN     | nibrin                                                    | L1 |
| 1423699_at   | NCAPH2  | non-SMC condensin II complex, subunit H2                  | L1 |
| 1444086_at   | NCKAP5  | NCK-associated protein 5                                  | L1 |
| 1418594_a_at | NCOA1   | nuclear receptor coactivator 1                            | L1 |
| 1435234_at   | NCOA2   | nuclear receptor coactivator 2                            |    |
| 1415923_at   | NDN     | necdin homolog (mouse)                                    | L1 |
| 1450976_at   | NDRG1   | N-myc downstream regulated 1                              | L1 |

|              |        |                                                                                    |    |
|--------------|--------|------------------------------------------------------------------------------------|----|
| 1417664_a_at | NDRG3  | NDRG family member 3                                                               | L1 |
| 1425850_a_at | NEK6   | NIMA (never in mitosis gene a)-related kinase 6                                    |    |
| 1438999_a_at | NFAT5  | nuclear factor of activated T-cells 5, tonicity-responsive                         |    |
| 1457117_at   | NFE2L2 | nuclear factor (erythroid-derived 2)-like 2                                        | L1 |
| 1427680_a_at | NFIB   | nuclear factor I/B                                                                 | L1 |
| 1423493_a_at | NFIX   | nuclear factor I/X (CCAAT-binding transcription factor)                            | L1 |
| 1436363_a_at | NFIX   | nuclear factor I/X (CCAAT-binding transcription factor)                            | L1 |
| 1436364_x_at | NFIX   | nuclear factor I/X (CCAAT-binding transcription factor)                            | L1 |
| 1427705_a_at | NFKB1  | nuclear factor of kappa light polypeptide gene enhancer in B-cells 1               |    |
| 1446718_at   | NFKBIB | nuclear factor of kappa light polypeptide gene enhancer in B-cells inhibitor, beta | L1 |



|              |        |                                                  |    |
|--------------|--------|--------------------------------------------------|----|
| 1434753_at   | NFRKB  | nuclear factor related to kappaB binding protein | L1 |
| 1423516_a_at | NID2   | nidogen 2 (osteonidogen)                         |    |
| 1453345_at   | NIPAL1 | NIPA-like domain containing 1                    |    |
| 1442103_at   | NIPBL  | Nipped-B homolog (Drosophila)                    |    |
| 1423249_at   | NKTR   | natural killer-tumor recognition sequence        |    |
| 1424981_at   | NLN    | neurolysin (metallopeptidase M3 family)          | L1 |
| 1425646_at   | NMRK1  | nicotinamide riboside kinase 1                   |    |
| 1418222_at   | NOA1   | nitric oxide associated 1                        | L1 |
| 1423211_at   | NOP10  | NOP10 ribonucleoprotein homolog (yeast)          |    |
| 1423210_a_at | NOP10  | NOP10 ribonucleoprotein homolog (yeast)          | L1 |
| 1421964_at   | NOTCH3 | notch 3                                          | L1 |
| 1423086_at   | NPC1   | Niemann-Pick disease, type C1                    | L1 |

|            |       |                                                                                          |    |
|------------|-------|------------------------------------------------------------------------------------------|----|
| 1427191_at | NPR2  | natriuretic peptide receptor B/guanylate cyclase B (atrionatriuretic peptide receptor B) | L1 |
| 1433548_at | NPRL3 | nitrogen permease regulator-like 3 ( <i>S. cerevisiae</i> )                              | L1 |
| 1426464_at | NR1D1 | nuclear receptor subfamily 1, group D, member 1                                          |    |
| 1418605_at | NR2C1 | nuclear receptor subfamily 2, group C, member 1                                          | L1 |
| 1420410_at | NR5A2 | nuclear receptor subfamily 5, group A, member 2                                          |    |
| 1417985_at | NRARP | NOTCH-regulated ankyrin repeat protein                                                   | L1 |
| 1423864_at | NRBP1 | nuclear receptor binding protein 1                                                       | L1 |
| 1418469_at | NRIP1 | nuclear receptor interacting protein 1                                                   |    |
| 1449089_at | NRIP1 | nuclear receptor interacting protein 1                                                   | L1 |

|              |         |                                                                               |    |
|--------------|---------|-------------------------------------------------------------------------------|----|
| 1423132_a_at | NSA2    | NSA2 ribosome biogenesis homolog<br>( <i>S. cerevisiae</i> )                  |    |
| 1422456_at   | NSF     | N-ethylmaleimide-sensitive factor                                             | L1 |
| 1447705_at   | NSL1    | NSL1, MIND kinetochore complex<br>component, homolog ( <i>S. cerevisiae</i> ) |    |
| 1416412_at   | NSMAF   | neutral sphingomyelinase (N-SMase)<br>activation associated factor            | L1 |
| 1428213_at   | NSMCE4A | non-SMC element 4 homolog A ( <i>S.</i><br><i>cerevisiae</i> )                | L1 |
| 1418905_at   | NUBP1   | nucleotide binding protein 1                                                  | L1 |
| 1416903_at   | NUCB1   | nucleobindin 1                                                                | L1 |
| 1444952_a_at | NUCKS1  | nuclear casein kinase and cyclin-<br>dependent kinase substrate 1             | L1 |
| 1442799_x_at | NUDCD3  | NudC domain containing 3                                                      | L1 |

|              |        |                                                              |    |
|--------------|--------|--------------------------------------------------------------|----|
| 1437213_at   | NUDT21 | nudix (nucleoside diphosphate linked moiety X)-type motif 21 | L1 |
| 1455966_s_at | NUDT21 | nudix (nucleoside diphosphate linked moiety X)-type motif 21 | L1 |
| 1460358_s_at | NUDT22 | nudix (nucleoside diphosphate linked moiety X)-type motif 22 | L1 |
| 1423787_at   | NUP133 | nucleoporin 133kDa                                           | L1 |
| 1426447_at   | NUP35  | nucleoporin 35kDa                                            |    |
| 1416073_a_at | NUP85  | nucleoporin 85kDa                                            | L1 |
| 1434220_at   | Nup98  | nucleoporin 98                                               | L1 |
| 1416452_at   | OAT    | ornithine aminotransferase                                   | L1 |
| 1426764_at   | OAZ2   | ornithine decarboxylase antizyme 2                           | L1 |
| 1438396_at   | OCRL   | oculocerebrorenal syndrome of Lowe                           |    |
| 1451888_a_at | ODZ4   | odz, odd Oz/ten-m homolog 4 (Drosophila)                     |    |
| 1434530_at   | ODZ4   | odz, odd Oz/ten-m homolog 4 (Drosophila)                     | L1 |

|              |         |                                                           |    |
|--------------|---------|-----------------------------------------------------------|----|
| 1455993_at   | ODZ4    | odz, odd Oz/ten-m homolog 4 (Drosophila)                  | L1 |
| 1426562_a_at | OLFM1   | olfactomedin 1                                            | L1 |
| 1432098_a_at | Olf701  | olfactory receptor 701                                    |    |
| 1419534_at   | OLR1    | oxidized low density lipoprotein (lectin-like) receptor 1 | L1 |
| 1435679_at   | OPTN    | optineurin                                                | L1 |
| 1418227_at   | ORC2    | origin recognition complex, subunit 2                     | L1 |
| 1453804_a_at | ORC4    | origin recognition complex, subunit 4                     | L1 |
| 1428355_at   | OSBP2   | oxysterol binding protein 2                               | L1 |
| 1434223_at   | OSCP1   | organic solute carrier partner 1                          |    |
| 1428557_a_at | OSGEPL1 | O-sialoglycoprotein endopeptidase-like 1                  | L1 |
| 1426000_at   | OXTR    | oxytocin receptor                                         |    |
| 1419853_a_at | P2RX7   | purinergic receptor P2X, ligand-gated ion channel, 7      | L1 |
| 1426519_at   | P4HA1   | prolyl 4-hydroxylase, alpha polypeptide I                 |    |

|              |         |                                                                 |    |
|--------------|---------|-----------------------------------------------------------------|----|
| 1437465_a_at | P4HB    | prolyl 4-hydroxylase, beta polypeptide                          | L1 |
| 1435372_a_at | PA2G4   | proliferation-associated 2G4, 38kDa                             | L1 |
| 1435762_at   | PACS1   | phosphofurin acidic cluster sorting protein 1                   | L1 |
| 1434255_at   | PACS2   | phosphofurin acidic cluster sorting protein 2                   | L1 |
| 1456403_at   | PAG1    | phosphoprotein associated with glycosphingolipid microdomains 1 |    |
| 1430875_a_at | PAK1IP1 | PAK1 interacting protein 1                                      |    |
| 1427228_at   | PALLD   | palladin, cytoskeletal associated protein                       |    |
| 1423967_at   | PALM    | paralemmin                                                      | L1 |
| 1435004_at   | PANK4   | pantothenate kinase 4                                           | L1 |
| 1415890_at   | PAPSS1  | 3'-phosphoadenosine 5'-phosphosulfate synthase 1                | L1 |
| 1425422_a_at | PARN    | poly(A)-specific ribonuclease                                   | L1 |

|              |         |                                                                  |    |
|--------------|---------|------------------------------------------------------------------|----|
| 1451969_s_at | PARP3   | poly (ADP-ribose) polymerase family, member 3                    | L1 |
| 1416818_at   | PARVA   | parvin, alpha                                                    | L1 |
| 1423302_a_at | PAXIP1  | PAX interacting (with transcription-activation domain) protein 1 | L1 |
| 1423303_at   | PAXIP1  | PAX interacting (with transcription-activation domain) protein 1 | L1 |
| 1436920_at   | PCDH17  | protocadherin 17                                                 | L1 |
| 1437360_at   | PCDH19  | protocadherin 19                                                 | L1 |
| 1448933_at   | PCDHB16 | protocadherin beta 16                                            | L1 |
| 1419048_at   | PCNX    | pecanex homolog (Drosophila)                                     | L1 |
| 1434020_at   | PDAP1   | PDGFA associated protein 1                                       | L1 |
| 1423534_at   | PDCD2   | programmed cell death 2                                          | L1 |
| 1426844_a_at | PDCD2L  | programmed cell death 2-like                                     | L1 |
| 1426845_at   | PDCD2L  | programmed cell death 2-like                                     | L1 |

|              |         |                                                        |    |
|--------------|---------|--------------------------------------------------------|----|
| 1433761_at   | PDE4DIP | phosphodiesterase 4D interacting protein               | L1 |
| 1425279_at   | PDIK1L  | PDLIM1 interacting kinase 1 like                       | L1 |
| 1441285_at   | PDP2    | pyruvate dehydrogenase phosphatase catalytic subunit 2 | L1 |
| 1431893_a_at | PDSS1   | prenyl (decaprenyl) diphosphate synthase, subunit 1    | L1 |
| 1452705_at   | PDXDC1  | pyridoxal-dependent decarboxylase domain containing 1  | L1 |
| 1421287_a_at | PECAM1  | platelet/endothelial cell adhesion molecule 1          | L1 |
| 1453207_at   | PET100  | PET100 homolog ( <i>S. cerevisiae</i> )                |    |
| 1456646_at   | PEX10   | peroxisomal biogenesis factor 10                       | L1 |
| 1417442_a_at | PEX3    | peroxisomal biogenesis factor 3                        | L1 |
| 1454044_a_at | PEX3    | peroxisomal biogenesis factor 3                        | L1 |



|              |         |                                                       |    |
|--------------|---------|-------------------------------------------------------|----|
| 1422091_at   | PFKFB2  | 6-phosphofructo-2-kinase/fructose-2,6-biphosphatase 2 | L1 |
| 1416432_at   | PFKFB3  | 6-phosphofructo-2-kinase/fructose-2,6-biphosphatase 3 | L1 |
| 1426554_a_at | PGAM1   | phosphoglycerate mutase 1 (brain)                     | L1 |
| 1438774_s_at | PGM2L1  | phosphoglucomutase 2-like 1                           |    |
| 1456606_a_at | PHACTR1 | phosphatase and actin regulator 1                     | L1 |
| 1423212_at   | PHC1    | polyhomeotic homolog 1 (Drosophila)                   | L1 |
| 1452179_at   | PHF17   | PHD finger protein 17                                 | L1 |
| 1421069_at   | PHF2    | PHD finger protein 2                                  |    |
| 1457264_at   | PHF20L1 | PHD finger protein 20-like 1                          |    |
| 1417837_at   | PHLDA2  | pleckstrin homology-like domain, family A, member 2   |    |
| 1437115_at   | PHRF1   | PHD and ring finger domains 1                         | L1 |
| 1451115_at   | PIAS3   | protein inhibitor of activated STAT, 3                | L1 |

|              |         |                                                           |    |
|--------------|---------|-----------------------------------------------------------|----|
| 1428488_at   | PIGK    | phosphatidylinositol glycan anchor biosynthesis, class K  | L1 |
| 1433429_at   | PIGS    | phosphatidylinositol glycan anchor biosynthesis, class S  | L1 |
| 1437956_at   | PIK3R6  | phosphoinositide-3-kinase, regulatory subunit 6           | L1 |
| 1416387_at   | PIP4K2C | phosphatidylinositol-5-phosphate 4-kinase, type II, gamma | L1 |
| 1426449_a_at | PJA1    | praja ring finger 1, E3 ubiquitin protein ligase          | L1 |
| 1420259_at   | PKP2    | plakophilin 2                                             | L1 |
| 1450533_a_at | PLAGL1  | pleiomorphic adenoma gene-like 1                          |    |
| 1448786_at   | PLBD1   | phospholipase B domain containing 1                       | L1 |
| 1416675_s_at | PLCD1   | phospholipase C, delta 1                                  | L1 |
| 1448432_at   | PLCD1   | phospholipase C, delta 1                                  | L1 |
| 1416013_at   | PLD3    | phospholipase D family, member 3                          | L1 |

|            |         |                                                                    |    |
|------------|---------|--------------------------------------------------------------------|----|
| 1460341_at | PLEKHB2 | pleckstrin homology domain containing, family B (eectins) member 2 | L1 |
| 1418595_at | PLIN4   | perilipin 4                                                        | L1 |
| 1415901_at | PLOD3   | procollagen-lysine, 2-oxoglutarate 5-dioxygenase 3                 | L1 |
| 1418912_at | PLXDC2  | plexin domain containing 2                                         | L1 |
| 1424661_at | PMPCA   | peptidase (mitochondrial processing) alpha                         |    |
| 1429709_at | PMPCB   | peptidase (mitochondrial processing) beta                          | L1 |
| 1453185_at | PNISR   | PNN-interacting serine/arginine-rich protein                       |    |
| 1429537_at | PNISR   | PNN-interacting serine/arginine-rich protein                       | L1 |
| 1423325_at | PNN     | pinin, desmosome associated protein                                | L1 |
| 1450735_at | PNO1    | partner of NOB1 homolog (S. cerevisiae)                            | L1 |
| 1444288_at | PNPT1   | polyribonucleotide nucleotidyltransferase 1                        | L1 |

|              |          |                                                              |    |
|--------------|----------|--------------------------------------------------------------|----|
| 1419265_at   | POC5     | POC5 centriolar protein homolog<br>(Chlamydomonas)           | L1 |
| 1416573_at   | POFUT2   | protein O-fucosyltransferase 2                               | L1 |
| 1448384_at   | POFUT2   | protein O-fucosyltransferase 2                               | L1 |
| 1449352_at   | POLL     | polymerase (DNA directed), lambda                            | L1 |
| 1456066_a_at | POLR1A   | polymerase (RNA) I polypeptide A,<br>194kDa                  | L1 |
| 1415754_at   | POLR2F   | polymerase (RNA) II (DNA directed)<br>polypeptide F          |    |
| 1453256_at   | POLR3C   | polymerase (RNA) III (DNA directed)<br>polypeptide C (62kD)  | L1 |
| 1450686_at   | PON2     | paraoxonase 2                                                | L1 |
| 1451210_at   | PPAP2C   | phosphatidic acid phosphatase type<br>2C                     | L1 |
| 1428154_s_at | PPAPDC1B | phosphatidic acid phosphatase type 2<br>domain containing 1B | L1 |

|              |          |                                                                       |    |
|--------------|----------|-----------------------------------------------------------------------|----|
| 1417801_a_at | PPFIBP2  | PTPRF interacting protein, binding protein 2 (liprin beta 2)          | L1 |
| 1416498_at   | PPIC     | peptidylprolyl isomerase C (cyclophilin C)                            | L1 |
| 1434475_at   | PPIG     | peptidylprolyl isomerase G (cyclophilin G)                            |    |
| 1460584_at   | PIP5K1   | diphosphoinositol pentakisphosphate kinase 1                          | L1 |
| 1453171_s_at | PPM1A    | protein phosphatase, Mg <sup>2+</sup> /Mn <sup>2+</sup> dependent, 1A | L1 |
| 1454934_at   | PPM1F    | protein phosphatase, Mg <sup>2+</sup> /Mn <sup>2+</sup> dependent, 1F | L1 |
| 1435699_at   | PPM1L    | protein phosphatase, Mg <sup>2+</sup> /Mn <sup>2+</sup> dependent, 1L |    |
| 1434786_at   | PPP1R12B | protein phosphatase 1, regulatory subunit 12B                         | L1 |
| 1454848_at   | PPP1R12C | protein phosphatase 1, regulatory subunit 12C                         | L1 |
| 1436716_at   | PPP1R14B | protein phosphatase 1, regulatory (inhibitor) subunit 14B             |    |
| 1436366_at   | PPP1R15B | protein phosphatase 1, regulatory subunit 15B                         |    |

|              |                 |                                                               |    |
|--------------|-----------------|---------------------------------------------------------------|----|
| 1426798_a_at | PPP1R15B        | protein phosphatase 1, regulatory subunit 15B                 | L1 |
| 1417341_a_at | Ppp1r2          | protein phosphatase 1, regulatory (inhibitor) subunit 2       | L1 |
| 1442024_at   | PPP1R3E         | protein phosphatase 1, regulatory subunit 3E                  | L1 |
| 1437730_at   | PPP2R2A         | protein phosphatase 2, regulatory subunit B, alpha            | L1 |
| 1428463_a_at | PPP2R5E         | protein phosphatase 2, regulatory subunit B', epsilon isoform | L1 |
| 1424115_at   | PPP5C           | protein phosphatase 5, catalytic subunit                      | L1 |
| 1424116_x_at | PPP5C           | protein phosphatase 5, catalytic subunit                      | L1 |
| 1451242_a_at | PPP5C           | protein phosphatase 5, catalytic subunit                      | L1 |
| 1422468_at   | PPT1            | palmitoyl-protein thioesterase 1                              | L1 |
| 1439160_at   | PRAMEF7/PRAMEF8 | PRAME family member 8                                         |    |
| 1452208_at   | PRDM4           | PR domain containing 4                                        | L1 |

|              |         |                                                                              |    |
|--------------|---------|------------------------------------------------------------------------------|----|
| 1436962_at   | PRDM6   | PR domain containing 6                                                       |    |
| 1416167_at   | PRDX4   | peroxiredoxin 4                                                              | L1 |
| 1455667_at   | PREB    | prolactin regulatory element binding                                         | L1 |
| 1424119_at   | PRKAB1  | protein kinase, AMP-activated, beta 1 non-catalytic subunit                  | L1 |
| 1428230_at   | PRKD3   | protein kinase D3                                                            | L1 |
| 1449876_at   | PRKG1   | protein kinase, cGMP-dependent, type I                                       |    |
| 1448923_at   | PRKRA   | protein kinase, interferon-inducible double stranded RNA dependent activator | L1 |
| 1427439_s_at | PRMT5   | protein arginine methyltransferase 5                                         |    |
| 1420664_s_at | PROCR   | protein C receptor, endothelial                                              | L1 |
| 1455524_at   | PROSER1 | proline and serine rich 1                                                    | L1 |
| 1460633_at   | PRPF19  | PRP19/PSO4 pre-mRNA processing factor 19 homolog ( <i>S. cerevisiae</i> )    | L1 |

|            |        |                                                                    |    |
|------------|--------|--------------------------------------------------------------------|----|
| 1422453_at | PRPF8  | PRP8 pre-mRNA processing factor 8 homolog ( <i>S. cerevisiae</i> ) | L1 |
| 1416052_at | PRPS1  | phosphoribosyl pyrophosphate synthetase 1                          | L1 |
| 1460349_at | PRR14  | proline rich 14                                                    | L1 |
| 1432613_at | PRR15  | proline rich 15                                                    | L1 |
| 1424058_at | PRRC1  | proline-rich coiled-coil 1                                         | L1 |
| 1429433_at | PRRC2C | proline-rich coiled-coil 2C                                        |    |
| 1431484_at | PRRG1  | proline rich Gla (G-carboxyglutamic acid) 1                        | L1 |
| 1441707_at | PSMA3  | proteasome (prosome, macropain) subunit, alpha type, 3             |    |
| 1416291_at | PSMC4  | proteasome (prosome, macropain) 26S subunit, ATPase, 4             | L1 |
| 1423697_at | PSMD6  | proteasome (prosome, macropain) 26S subunit, non-ATPase, 6         | L1 |
| 1415673_at | PSPH   | phosphoserine phosphatase                                          | L1 |
| 1428853_at | PTCH1  | patched 1                                                          |    |
| 1422655_at | PTCH2  | patched 2                                                          |    |



|              |        |                                                    |    |
|--------------|--------|----------------------------------------------------|----|
| 1460010_a_at | PTDSS2 | phosphatidylserine synthase 2                      | L1 |
| 1449449_at   | PTGES  | prostaglandin E synthase                           | L1 |
| 1449450_at   | PTGES  | prostaglandin E synthase                           | L1 |
| 1417092_at   | PTH1R  | parathyroid hormone 1 receptor                     | L1 |
| 1434653_at   | PTK2B  | PTK2B protein tyrosine kinase 2 beta               | L1 |
| 1418181_at   | PTP4A3 | protein tyrosine phosphatase type IVA, member 3    | L1 |
| 1433823_at   | PTPDC1 | protein tyrosine phosphatase domain containing 1   | L1 |
| 1427699_a_at | PTPN11 | protein tyrosine phosphatase, non-receptor type 11 |    |
| 1417140_a_at | PTPN2  | protein tyrosine phosphatase, non-receptor type 2  | L1 |
| 1427486_at   | PTPRB  | protein tyrosine phosphatase, receptor type, B     | L1 |
| 1420841_at   | PTPRF  | protein tyrosine phosphatase, receptor type, F     |    |

|              |           |                                                         |    |
|--------------|-----------|---------------------------------------------------------|----|
| 1420843_at   | PTPRF     | protein tyrosine phosphatase, receptor type, F          | L1 |
| 1434360_s_at | PTPRG     | protein tyrosine phosphatase, receptor type, G          | L1 |
| 1423117_at   | PUM1      | pumilio homolog 1 (Drosophila)                          | L1 |
| 1428800_a_at | PUS7L     | pseudouridylate synthase 7 homolog (S. cerevisiae)-like |    |
| 1448673_at   | PVRL3     | poliovirus receptor-related 3                           | L1 |
| 1451253_at   | PXK       | PX domain containing serine/threonine kinase            | L1 |
| 1417741_at   | PYGL      | phosphorylase, glycogen, liver                          | L1 |
| 1423712_a_at | QARS      | glutaminyl-tRNA synthetase                              | L1 |
| 1449518_at   | QPCTL     | glutaminyl-peptide cyclotransferase-like                | L1 |
| 1452736_at   | R3HCC1    | R3H domain and coiled-coil containing 1                 |    |
| 1438905_x_at | R3HDM4    | R3H domain containing 4                                 | L1 |
| 1438022_at   | RAB11FIP3 | RAB11 family interacting protein 3 (class II)           | L1 |

|              |         |                                                         |    |
|--------------|---------|---------------------------------------------------------|----|
| 1419946_s_at | RAB2A   | RAB2A, member RAS oncogene family                       |    |
| 1433922_at   | RAB35   | RAB35, member RAS oncogene family                       | L1 |
| 1417700_at   | RAB38   | RAB38, member RAS oncogene family                       |    |
| 1418341_at   | RAB4A   | RAB4A, member RAS oncogene family                       | L1 |
| 1425602_a_at | RABEP2  | rabaptin, RAB GTPase binding effector protein 2         | L1 |
| 1456822_at   | RAD23B  | RAD23 homolog B ( <i>S. cerevisiae</i> )                |    |
| 1416602_a_at | RAD52   | RAD52 homolog ( <i>S. cerevisiae</i> )                  | L1 |
| 1417248_at   | RALBP1  | ralA binding protein 1                                  | L1 |
| 1443877_a_at | RAPGEF6 | Rap guanine nucleotide exchange factor (GEF) 6          | L1 |
| 1428538_s_at | RARRES2 | retinoic acid receptor responder (tazarotene induced) 2 |    |
| 1423619_at   | RASD1   | RAS, dexamethasone-induced 1                            | L1 |

|              |        |                                                                   |    |
|--------------|--------|-------------------------------------------------------------------|----|
| 1438713_at   | RASSF8 | Ras association (RalGDS/AF-6) domain family (N-terminal) member 8 |    |
| 1426487_a_at | RBBP6  | retinoblastoma binding protein 6                                  | L1 |
| 1416174_at   | RBBP9  | retinoblastoma binding protein 9                                  | L1 |
| 1425166_at   | RBL1   | retinoblastoma-like 1 (p107)                                      |    |
| 1418146_a_at | RBL2   | retinoblastoma-like 2 (p130)                                      | L1 |
| 1425981_a_at | RBL2   | retinoblastoma-like 2 (p130)                                      | L1 |
| 1423741_at   | RBM10  | RNA binding motif protein 10                                      | L1 |
| 1425522_at   | RBM25  | RNA binding motif protein 25                                      | L1 |
| 1455430_at   | RBM33  | RNA binding motif protein 33                                      | L1 |
| 1426671_a_at | RBM39  | RNA binding motif protein 39                                      | L1 |
| 1418703_at   | RBMS1  | RNA binding motif, single stranded interacting protein 1          | L1 |
| 1429359_s_at | RPMS   | RNA binding protein with multiple splicing                        |    |
| 1444765_at   | RPMS   | RNA binding protein with multiple splicing                        |    |

|              |        |                                                                                       |    |
|--------------|--------|---------------------------------------------------------------------------------------|----|
| 1425652_s_at | RBPMS  | RNA binding protein with multiple splicing                                            | L1 |
| 1434027_at   | RCAN3  | RCAN family member 3                                                                  |    |
| 1416390_at   | RCBTB2 | regulator of chromosome condensation (RCC1) and BTB (POZ) domain containing protein 2 |    |
| 1416730_at   | RCL1   | RNA terminal phosphate cyclase-like 1                                                 | L1 |
| 1422449_s_at | RCN2   | reticulocalbin 2, EF-hand calcium binding domain                                      | L1 |
| 1434336_s_at | RCOR1  | REST corepressor 1                                                                    | L1 |
| 1421235_s_at | RECQL5 | RecQ protein-like 5                                                                   | L1 |
| 1433509_s_at | REEP1  | receptor accessory protein 1                                                          |    |
| 1430128_a_at | REEP6  | receptor accessory protein 6                                                          | L1 |
| 1417856_at   | RELB   | v-rel reticuloendotheliosis viral oncogene homolog B                                  | L1 |
| 1416216_at   | REPS1  | RALBP1 associated Eps domain containing 1                                             | L1 |

|            |      |                                                  |    |
|------------|------|--------------------------------------------------|----|
| 1454670_at | RERE | arginine-glutamic acid dipeptide (RE)<br>repeats | L1 |
| 1424321_at | RFC4 | replication factor C (activator 1) 4,<br>37kDa   | L1 |
