# Supplementary material for: Biologically anchored knowledge expansion approach uncovers KLF4 as a novel insulin signaling regulator
Source: PubMed Central journal article supplement (PMC6150497; doi:10.1371/journal.pone.0204100), 2018-09-21
Supplement: pone.0204100.s007.pdf [file pone.0204100.s007.pdf]

**S3 Table. Insulin Signaling Pathway Genes ( $L_{path}$ ) and Anchor Genes ( $L_{anchor}$ ).**

| $L_{path}$ Genes |                   |                     |                    |
|------------------|-------------------|---------------------|--------------------|
| Probe Set ID     | Gene Symbol       | Log <sub>2</sub> FC | $L_{anchor}$ Genes |
| 1416657_at       | Akt1              | -1.44408            | $L_{anchor}$       |
| 1425711_a_at     | Akt1              | -1.3978             | $L_{anchor}$       |
| 1424480_s_at     | Akt2              | -1.60568            | $L_{anchor}$       |
| 1421324_a_at     | Akt2              | -0.56584            |                    |
| 1455703_at       | Akt2              | -0.07078            |                    |
| 1426239_s_at     | Arrb2             | -0.38043            |                    |
| 1451987_at       | Arrb2             | -0.74716            |                    |
| 1417592_at       | FRAP1             | -0.76872            | $L_{anchor}$       |
| 1436267_a_at     | FRAP1             | -0.38295            |                    |
| 1415958_at       | glut4             | -1.52396            | $L_{anchor}$       |
| 1415959_at       | glut4             | -2.30059            | $L_{anchor}$       |
| 1435638_at       | Gsk3a             | 0.042993            |                    |
| 1434439_at       | Gsk3b             | 0.425375            |                    |
| 1437001_at       | Gsk3b             | 0.039469            |                    |
| 1451020_at       | Gsk3b             | 0.063825            |                    |
| 1454958_at       | Gsk3b             | -0.18383            |                    |
| 1450196_s_at     | GYS1              | -0.88146            | $L_{anchor}$       |
| 1416737_at       | GYS1              | -1.28798            | $L_{anchor}$       |
| 1422447_at       | Ins1              | 0.027214            |                    |
| 1422446_x_at     | Ins2              | 0.195037            |                    |
| 1434446_at       | IR A/B            | -0.00117            |                    |
| 1423104_at       | IRS1              | -0.86892            |                    |
| 1443969_at       | IRS2              | -1.43486            | $L_{anchor}$       |
| 1437672_at       | IRS3              | -0.24064            |                    |
| 1420931_at       | JNK1              | -0.19766            |                    |
| 1421876_at       | JNK2              | -1.41937            |                    |
| 1417273_at       | pdk4              | 0.061052            |                    |
| 1416501_at       | Pdpk1 (PDK1)      | -0.40082            |                    |
| 1415729_at       | Pdpk1(PDK1)       | 0.97709             |                    |
| 1426994_at       | Phlpp1            | -0.33884            |                    |
| 1444593_at       | PHLPP2            | 0.2107              |                    |
| 1435601_at       | PHLPP2            | 0.026679            |                    |
| 1453069_at       | Pik3cb(P110 beta) | -1.02557            | $L_{anchor}$       |
| 1425514_at       | Pik3r1            | 0.175572            |                    |
| 1438682_at       | Pik3r1            | 0.149941            |                    |

|              |               |          |          |
|--------------|---------------|----------|----------|
| 1451737_at   | Pik3r1        | -0.34413 |          |
| 1418463_at   | Pik3r2        | -0.67342 |          |
| 1426044_a_at | PKC-theta     | 0.221952 |          |
| 1417367_at   | pp2ac         | -1.01022 | L_anchor |
| 1456390_at   | pp2ac         | -0.34157 |          |
| 1422553_at   | Pten          | -0.31217 |          |
| 1450655_at   | Pten          | -1.18513 |          |
| 1454722_at   | Pten          | -0.6018  |          |
| 1455728_at   | Pten          | 0.068324 |          |
| 1457493_at   | Pten          | 0.249687 |          |
| 1417068_a_at | PTP 1B        | -0.35068 |          |
| 1438670_at   | PTP 1B        | -0.30576 |          |
| 1453095_at   | Rab10         | -1.19224 | L_anchor |
| 1422664_at   | Rab10         | -0.31038 |          |
| 1429296_at   | Rab10         | -0.86471 |          |
| 1457624_at   | Rab8a         | 0.038289 |          |
| 1440620_at   | Rab8a         | 0.687193 |          |
| 1434619_at   | Raptor        | -1.0083  | L_anchor |
| 1430784_a_at | Raptor        | -0.09409 |          |
| 1458472_at   | Raptor        | 0.344551 |          |
| 1449182_at   | Retn          | -0.10437 |          |
| 1427583_at   | Rictor        | 0.413408 | L_anchor |
| 1435698_at   | Rictor        | 0.20103  |          |
| 1441753_at   | Rictor        | -0.49329 |          |
| 1453775_at   | Rictor        | -0.01628 |          |
| 1429810_at   | Rictor        | 1.335436 |          |
| 1460394_a_at | SHIP2         | -1.17949 | L_anchor |
| 1427699_a_at | SHP2 (ptpn11) | 1.692462 | L_anchor |
| 1451225_at   | SHP2(ptpn11)  | -0.40662 |          |
| 1421196_at   | SHP2(ptpn11)  | -0.00081 |          |
| 1440047_at   | Socs1         | -0.19449 |          |
| 1450446_a_at | Socs1         | -0.43768 |          |
| 1416576_at   | Socs3         | -2.42518 | L_anchor |
| 1455899_x_at | Socs3         | -1.248   | L_anchor |
| 1456212_x_at | Socs3         | -1.5813  | L_anchor |
| 1419448_at   | Tbc1d1        | 0.382683 |          |
| 1447016_at   | Tbc1d1        | 0.604145 |          |
| 1435292_at   | Tbc1d4        | -1.36206 |          |
| 1455903_at   | Tbc1d4        | -0.56784 |          |
| 1419607_at   | Tnfalpha      | -0.58929 |          |

|            |          |          |          |
|------------|----------|----------|----------|
| 1417291_at | Tnfrsf1a | -1.24859 | L_anchor |
| 1448951_at | Tnfrsf1b | 0.225151 |          |
| 1437001_at | Gsk3b    | 0.039469 |          |
| 1451020_at | Gsk3b    | 0.063825 |          |
| 1454958_at | Gsk3b    | -0.18383 |          |
