# Supplementary material for: Biologically anchored knowledge expansion approach uncovers KLF4 as a novel insulin signaling regulator
Source: PubMed Central journal article supplement (PMC6150497; doi:10.1371/journal.pone.0204100), 2018-09-21
Supplement: pone.0204100.s008.pdf [file pone.0204100.s008.pdf]

**S4 Table. Twenty Novel Neighbor Genes Around Anchor Gene IRS2 ( $L_{IRS2}$ )**

| <b>Probe Set ID</b> | <b>Gene Symbol</b> | <b>Gene Title</b>                                        | <b>Log<sub>2</sub>FC</b> |
|---------------------|--------------------|----------------------------------------------------------|--------------------------|
| 1417395_at          | KLF4               | Kruppel-like factor 4 (gut)                              | -2.29942                 |
| 1439859_at          | C12orf5            | chromosome 12 open reading frame 5                       | 0.776905                 |
| 1448668_a_at        | IRAK1              | interleukin-1 receptor-associated kinase 1               | -2.08696                 |
| 1452045_at          | ZNF281             | zinc finger protein 281                                  | -1.05731                 |
| 1437633_at          | ANKRD11            | ankyrin repeat domain 11                                 | -1.62611                 |
| 1419048_at          | PCNX               | pecanex homolog (Drosophila)                             | -0.9939                  |
| 1460005_at          | BOD1L              | biorientation of chromosomes in cell division 1-like     | -0.92322                 |
| 1425975_a_at        | MAPK8IP3           | mitogen-activated protein kinase 8 interacting protein 3 | -1.32734                 |
| 1429415_at          | ZMYND8             | zinc finger, MYND-type containing 8                      | -1.00064                 |
| 1419191_at          | HIPK3              | homeodomain interacting protein kinase 3                 | -1.06855                 |
| 1437745_at          | CHD7               | chromodomain helicase DNA binding protein 7              | -1.44179                 |
| 1436363_a_at        | NFIX               | nuclear factor I/X (CCAAT-binding transcription factor)  | -1.47594                 |

|              |               |                                                             |          |
|--------------|---------------|-------------------------------------------------------------|----------|
| 1438022_at   | RAB11FIP3     | RAB11 family interacting protein 3 (class II)               | -0.72432 |
| 1428472_at   | SPSB1         | splA/ryanodine receptor domain and SOCS box containing 1    | -1.0807  |
| 1427978_at   | KIAA0494      | KIAA0494                                                    | -1.43792 |
| 1433933_s_at | SLCO2B1       | solute carrier organic anion transporter family, member 2B1 | -0.83896 |
| 1436364_x_at | NFIX          | nuclear factor I/X (CCAAT-binding transcription factor)     | -1.55931 |
| 1448298_at   | TNK2          | tyrosine kinase, non-receptor, 2                            | -1.52558 |
| 1433142_at   | 4921504P05Rik | RIKEN cDNA 4921504P05 gene                                  | 0.399526 |
| 1422584_at   | SKIV2L        | superkiller viralicidic activity 2-like (S. cerevisiae)     | -1.51695 |
