# Supplementary material for: Biologically anchored knowledge expansion approach uncovers KLF4 as a novel insulin signaling regulator
Source: PubMed Central journal article supplement (PMC6150497; doi:10.1371/journal.pone.0204100), 2018-09-21
Supplement: pone.0204100.s009.pdf [file pone.0204100.s009.pdf]

**S5 Table. IRS2 Promoter Analysis**

| <b>Binding Site</b> | <b>Position in Mouse Promoter</b> | <b>Position in Human Promoter</b> | <b>Position in Rat Promoter</b> |
|---------------------|-----------------------------------|-----------------------------------|---------------------------------|
| 1. GGGGCGC          | 1366, 1094                        | 1679, 1129, 706, 646              | 1356, 1327, 1078                |
| 2. GGGGCGT          | 1337, 580                         |                                   |                                 |
| 3. GGGGTGC          |                                   | 1878, 1582                        | 1379                            |
| 4. GGGGTGT          |                                   |                                   |                                 |
| 5. GAGGCGC          |                                   |                                   |                                 |
| 6. GAGGCGT          |                                   |                                   |                                 |
| 7. GAGGTGC          |                                   |                                   |                                 |
| 8. GAGGTGT          |                                   |                                   |                                 |
| 9. AGGGCGC          | 1344                              | 1722, 1702, 1268, 198             | 1334, 845                       |
| 10. AGGGCGT         |                                   |                                   |                                 |
| 11. AGGGTGC         | 9765                              | 7188                              |                                 |
| 12. AGGGTGT         | 2138, 1875                        |                                   | 2128                            |
| 13. AAGGCGC         |                                   |                                   |                                 |
| 14. AAGGCGT         | 4467                              |                                   |                                 |
| 15. AAGGTGC         | 5984                              |                                   | 9029, 4776                      |
| 16. AAGGTGT         | 6300                              | 6218, 3383                        | 5896                            |
