# Supplementary material for: Biologically anchored knowledge expansion approach uncovers KLF4 as a novel insulin signaling regulator
Source: PubMed Central journal article supplement (PMC6150497; doi:10.1371/journal.pone.0204100), 2018-09-21
Supplement: pone.0204100.s010.pdf [file pone.0204100.s010.pdf]

**S6 Table. Twenty Novel Neighbor Genes Around Anchor Gene KLF4 (L<sub>KLF4</sub>)**

| <b>Probe Set ID</b> | <b>Gene Symbol</b> | <b>Gene Title</b>                                                                                             | <b>Log<sub>2</sub>(FC)</b> |
|---------------------|--------------------|---------------------------------------------------------------------------------------------------------------|----------------------------|
| 1452105_a_at        | Tsc2               | tuberous sclerosis 2                                                                                          | -2.126079                  |
| 1421861_at          | Clstn1             | calsyntenin 1                                                                                                 | -1.361094                  |
| 1448189_a_at        | Flii               | flightless I homolog<br>(Drosophila)                                                                          | -1.334569                  |
| 1422521_at          | Dctn1              | dynactin 1                                                                                                    | -1.903575                  |
| 1428596_at          | Tbc1d9b            | TBC1 domain family,<br>member 9B                                                                              | -0.965517                  |
| 1438022_at          | Rab11fip3          | RAB11 family interacting<br>protein 3 (class II)                                                              | -0.724315                  |
| 1454645_at          | Mgrn1              | mahogunin, ring finger 1                                                                                      | -1.43729                   |
| 1427287_s_at        | Itpr2              | inositol 1,4,5-triphosphate<br>receptor 2                                                                     | -1.181218                  |
| 1456880_at          | ---                | ---                                                                                                           | -0.881965                  |
| 1423622_a_at        | Ccn1               | cyclin L1                                                                                                     | -1.141852                  |
| 1443969_at          | Irs2               | insulin receptor substrate<br>2                                                                               | -1.434855                  |
| 1450406_a_at        | St3gal3            | ST3 beta-galactoside<br>alpha-2,3-sialyltransferase<br>3                                                      | -1.119139                  |
| 1429415_at          | Zmynd8             | zinc finger, MYND-type<br>containing 8                                                                        | -1.000644                  |
| 1422453_at          | Prpf8              | pre-mRNA processing<br>factor 8                                                                               | -1.831634                  |
| 1418467_at          | Smarcd3            | SWI/SNF related, matrix<br>associated, actin<br>dependent regulator of<br>chromatin, subfamily d,<br>member 3 | -0.831901                  |

|              |          |                                                      |           |
|--------------|----------|------------------------------------------------------|-----------|
| 1433937_at   | Trp53bp2 | transformation related protein 53 binding protein 2  | -1.143585 |
| 1416576_at   | Socs3    | suppressor of cytokine signaling 3                   | -2.425183 |
| 1460005_at   | Bod1l    | biorientation of chromosomes in cell division 1-like | -0.923224 |
| 1452045_at   | Zfp281   | zinc finger protein 281                              | -1.057306 |
| 1451521_x_at | Eif4h    | eukaryotic translation initiation factor 4H          | -1.03088  |
