# Supplementary material for: Biologically anchored knowledge expansion approach uncovers KLF4 as a novel insulin signaling regulator
Source: PubMed Central journal article supplement (PMC6150497; doi:10.1371/journal.pone.0204100), 2018-09-21
Supplement: pone.0204100.s011.pdf [file pone.0204100.s011.pdf]

**S7 Table. TSC2 Promoter Analysis**

| <b>Binding Site</b> | <b>Position in Mouse Promoter</b> | <b>Position in Human Promoter</b> | <b>Position in Rat Promoter</b> |
|---------------------|-----------------------------------|-----------------------------------|---------------------------------|
| 1. GGGGCGC          |                                   | 10056                             |                                 |
| 2. GGGGCGT          |                                   |                                   |                                 |
| 3. GGGGTGC          |                                   | 8179, 2195, 2124,<br>605          |                                 |
| 4. GGGGTGT          | 512, 64                           |                                   | 4906, 4882, 532                 |
| 5. GAGGCGC          |                                   |                                   |                                 |
| 6. GAGGCGT          |                                   |                                   |                                 |
| 7. GAGGTGC          | 5301, 2970                        | 8211, 7217                        | 5890, 4607, 4307,<br>1580       |
| 8. GAGGTGT          | 2097                              | 72                                |                                 |
| 9. AGGGCGC          |                                   |                                   |                                 |
| 10. AGGGCGT         |                                   |                                   | 6697                            |
| 11. AGGGTGC         | 1790                              | 8638, 2577                        | 4003                            |
| 12. AGGGTGT         |                                   | 7443                              | 9761, 3358                      |
| 13. AAGGCGC         | 469                               | 1070                              | 489                             |
| 14. AAGGCGT         |                                   |                                   | 3550                            |
| 15. AAGGTGC         | 4438                              | 2596, 2019                        | 875                             |
| 16. AAGGTGT         |                                   | 7453                              |                                 |
