# Supplementary material for: Biologically anchored knowledge expansion approach uncovers KLF4 as a novel insulin signaling regulator
Source: PubMed Central journal article supplement (PMC6150497; doi:10.1371/journal.pone.0204100), 2018-09-21
Supplement: pone.0204100.s012.pdf [file pone.0204100.s012.pdf]

**S8 Table. List of Differentially Expressed Adipogenesis Network and Anchor Genes.**

| <b>L<sub>path adipog</sub> Genes</b> |                    |                                                    |                          |                                        |
|--------------------------------------|--------------------|----------------------------------------------------|--------------------------|----------------------------------------|
| <b>Probe Set ID</b>                  | <b>Gene Symbol</b> | <b>Gene Title</b>                                  | <b>Log<sub>2</sub>FC</b> | <b>L<sub>anchor adipog Genes</sub></b> |
| 1422651_at                           | Adipoq             | adiponectin, C1Q and collagen domain containing    | -0.421347                |                                        |
| 1435077_at                           | ASXL1              | additional sex combs like 1                        | -0.542604                |                                        |
| 1422912_at                           | BMP4               | bone morphogenetic protein 4                       | -1.195104                |                                        |
| 1418982_at                           | CEBPa              | CCAAT/enhancer binding protein (C/EBP), alpha      | -1.055289                |                                        |
| 1427844_a_at                         | CEBPb              | CCAAT/enhancer binding protein (C/EBP), beta       | -1.416855                | L <sub>anchor</sub>                    |
| 1418901_at                           | CEBPb              | CCAAT/enhancer binding protein (C/EBP), beta       | -0.727956                |                                        |
| 1423233_at                           | CEBPd              | CCAAT/enhancer binding protein (C/EBP), delta      | -1.336919                |                                        |
| 1456605_at                           | CEBPd              | CCAAT/enhancer binding protein (C/EBP), delta      | -0.516927                | L <sub>anchor</sub>                    |
| 1437745_at                           | CHD7               | chromodomain helicase DNA binding protein 7        | -1.441792                | L <sub>anchor</sub>                    |
| 1438992_x_at                         | CREB2              | activating transcription factor 4                  | 0.514875                 |                                        |
| 1448135_at                           | CREB2              | activating transcription factor 4                  | -0.441271                | L <sub>anchor</sub>                    |
| 1424471_at                           | EPAC               | Rap guanine nucleotide exchange factor (GEF) 3     | -0.974207                | L <sub>anchor</sub>                    |
| 1427060_at                           | ERK1               | mitogen-activated protein kinase 3                 | -0.883972                | L <sub>anchor</sub>                    |
| 1426585_s_at                         | ERK2               | mitogen-activated protein kinase 1                 | -1.202173                |                                        |
| 1416544_at                           | EZH2               | enhancer of zeste homolog 2 (Drosophila)           | -0.497959                |                                        |
| 1448886_at                           | GATA3              | GATA binding protein 3                             | -0.418089                | L <sub>anchor</sub>                    |
| 1421866_at                           | GR                 | nuclear receptor subfamily 3, group C, member 1    | -0.788955                |                                        |
| 1421867_at                           | GR                 | nuclear receptor subfamily 3, group C, member 1    | -1.375725                |                                        |
| 1433444_at                           | HMGCS1             | 3-hydroxy-3-methylglutaryl-Coenzyme A synthase 1   | -0.797982                |                                        |
| 1433445_x_at                         | HMGCS1             | 3-hydroxy-3-methylglutaryl-Coenzyme A synthase 1   | -0.609106                | L <sub>anchor</sub>                    |
| 1424458_at                           | JMJDC2C            | lysine (K)-specific demethylase 4C                 | -0.868275                |                                        |
| 1417395_at                           | KLF4               | Kruppel-like factor 4 (gut)                        | -2.299423                |                                        |
| 1451022_at                           | LRP6               | low density lipoprotein receptor-related protein 6 | 0.746302                 | L <sub>anchor</sub>                    |
| 1427150_at                           | MLL3               | lysine (K)-specific methyltransferase 2C           | -0.518829                |                                        |
| 1416572_at                           | MMP14              | matrix metalloproteinase 14 (membrane-inserted)    | -0.48744                 |                                        |

|              |           |                                                                     |           |          |
|--------------|-----------|---------------------------------------------------------------------|-----------|----------|
| 1448383_at   | MMP14     | matrix metalloproteinase 14 (membrane-inserted)                     | -1.078622 |          |
| 1423202_a_at | NCOR1     | nuclear receptor co-repressor 1                                     | -0.722665 | L_anchor |
| 1448893_at   | NCOR2     | nuclear receptor co-repressor 2                                     | -1.35313  |          |
| 1456467_s_at | NLK       | nemo like kinase                                                    | 0.742247  |          |
| 1425837_a_at | Nocturnin | CCR4 carbon catabolite repression 4-like ( <i>S. cerevisiae</i> )   | -0.806877 |          |
| 1426464_at   | NR1D1     | nuclear receptor subfamily 1, group D, member 1                     | -1.475204 | L_anchor |
| 1425615_a_at | PCK2      | phosphoenolpyruvate carboxykinase 2 (mitochondrial)                 | -0.925597 |          |
| 1425580_a_at | PIK3C3    | phosphoinositide-3-kinase, class 3                                  | -0.779372 |          |
| 1429434_at   | PIK3Ca    | phosphatidylinositol 3-kinase, catalytic, alpha polypeptide         | 0.813153  |          |
| 1429435_x_at | PIK3Ca    | phosphatidylinositol 3-kinase, catalytic, alpha polypeptide         | 0.677044  |          |
| 1460326_at   | PIK3Ca    | phosphatidylinositol 3-kinase, catalytic, alpha polypeptide         | -0.837878 |          |
| 1453069_at   | PIK3Cb    | phosphatidylinositol 3-kinase, catalytic, beta polypeptide          | -1.025567 | L_anchor |
| 1443798_at   | PIK3Cd    | phosphatidylinositol 3-kinase catalytic delta polypeptide           | 2.096801  | L_anchor |
| 1420611_at   | PKA       | protein kinase, cAMP dependent, catalytic, beta                     | -0.948384 |          |
| 1450519_a_at | PKA       | protein kinase, cAMP dependent, catalytic, alpha                    | -1.385787 |          |
| 1423302_a_at | PTIP      | PAX interacting (with transcription-activation domain) protein 1    | -0.622208 |          |
| 1423303_at   | PTIP      | PAX interacting (with transcription-activation domain) protein 1    | -1.382188 |          |
| 1454943_a_at | PTIP      | PAX interacting (with transcription-activation domain) protein 1    | -0.423649 |          |
| 1423734_at   | RAC1      | RAS-related C3 botulinum substrate 1                                | -0.736388 |          |
| 1425762_a_at | RXRa      | retinoid X receptor alpha                                           | -0.5068   | L_anchor |
| 1454773_at   | RXRa      | retinoid X receptor alpha                                           | -1.106345 |          |
| 1416990_at   | RXRb      | retinoid X receptor beta                                            | -0.675337 |          |
| 1426406_at   | SETD8     | SET domain containing (lysine methyltransferase) 8                  | -0.902194 |          |
| 1416670_at   | SETDB1    | SET domain, bifurcated 1                                            | 0.615873  |          |
| 1451833_a_at | SETDB1    | SET domain, bifurcated 1                                            | -0.446396 |          |
| 1423507_a_at | SIRT2     | sirtuin 2                                                           | -0.733882 | L_anchor |
| 1415958_at   | SLC2A4    | solute carrier family 2 (facilitated glucose transporter), member 4 | -1.523955 |          |

|              |                 |                                                                                                   |           |          |
|--------------|-----------------|---------------------------------------------------------------------------------------------------|-----------|----------|
| 1415959_at   | SLC2A4          | solute carrier family 2 (facilitated glucose transporter), member 4                               | -2.300591 |          |
| 1459843_s_at | SMAD1           | SMAD family member 1                                                                              | 0.881402  |          |
| 1448994_at   | SP1             | trans-acting transcription factor 1                                                               | 0.472075  |          |
| 1426690_a_at | SREBF1          | sterol regulatory element binding transcription factor 1                                          | -1.385623 | L_anchor |
| 1450008_a_at | $\beta$ catenin | catenin (cadherin associated protein), beta 1                                                     | -2.198538 |          |
| 1420811_a_at | $\beta$ catenin | catenin (cadherin associated protein), beta 1                                                     | -0.817598 |          |
| 1426587_a_at | STAT3           | signal transducer and activator of transcription 3                                                | -1.599634 | L_anchor |
| 1459961_a_at | STAT3           | signal transducer and activator of transcription 3                                                | -1.049479 |          |
| 1460700_at   | STAT3           | signal transducer and activator of transcription 3                                                | -1.144656 |          |
| 1421469_a_at | STAT5A          | signal transducer and activator of transcription 5A                                               | -1.101546 |          |
| 1417440_at   | SWI1            | AT rich interactive domain 1A (SWI-like)                                                          | -1.505176 |          |
| 1455979_at   | SWI1            | AT rich interactive domain 1B (SWI-like)                                                          | 0.518932  |          |
| 1426804_at   | SWI2            | SWI/SNF related, matrix associated, actin dependent regulator of chromatin, subfamily a, member 4 | -1.263507 |          |
| 1426805_at   | SWI2            | SWI/SNF related, matrix associated, actin dependent regulator of chromatin, subfamily a, member 4 | -1.912802 |          |
| 1450461_at   | TCF7            | transcription factor 7, T cell specific                                                           | 0.461626  |          |
| 1433471_at   | TCF7            | transcription factor 7, T cell specific                                                           | -0.295828 | L_anchor |
| 1423250_a_at | TGFB2           | transforming growth factor, beta 2                                                                | -0.318399 | L_anchor |
| 1450922_a_at | TGFB2           | transforming growth factor, beta 2                                                                | -0.711545 |          |
| 1419089_at   | TIMP3           | tissue inhibitor of metalloproteinase 3                                                           | -1.475497 |          |
| 1458512_at   | TLE3            | transducin-like enhancer of split 3, homolog of Drosophila E(spl)                                 | -0.911589 | L_anchor |
| 1451006_at   | XDH             | xanthine dehydrogenase                                                                            | -1.057305 |          |
