# Supplementary material for: Biologically anchored knowledge expansion approach uncovers KLF4 as a novel insulin signaling regulator
Source: PubMed Central journal article supplement (PMC6150497; doi:10.1371/journal.pone.0204100), 2018-09-21
Supplement: pone.0204100.s013.pdf [file pone.0204100.s013.pdf]

**S9 Table. Novel Genes Discovered by BAKE during Adipogenesis Network Expansion.**

|                    |
|--------------------|
| <b>Novel Genes</b> |
| 4933407C03Rik      |
| A930012O16Rik      |
| APLP2              |
| ARF4               |
| ATP11A             |
| ATRX               |
| CCL11              |
| CDKN1C             |
| <b>CEBPb*</b>      |
| CHUK               |
| COPS7A             |
| CSNK1D             |
| CXCL12             |
| D5ERTD579E         |
| DDX60              |
| GCLM               |
| GNA11              |
| GPC6               |
| MRPL17             |
| NSMCE4A            |
| NUP98              |
| <b>PCK2</b>        |
| PPP1R12C           |

|               |
|---------------|
| PTPRB         |
| RUSC2         |
| SAP30I        |
| <b>SETDB1</b> |
| SGP1          |
| SNX6          |
| SPSB1         |
| SS18          |
| <b>TGFB2*</b> |
| ThAP4         |
| <b>TIMP3</b>  |
| TOR1AP1       |
| <b>XDH</b>    |
| ZXSCAN17      |

\* Genes TGFB2 and CEBPb had multiple probes that appeared both among the list of anchor genes ( $L_{\text{anchor adipog}}$ ) and hidden genes ( $L_{\text{hidden}}$ ).
