# Supplementary material for: Biologically anchored knowledge expansion approach uncovers KLF4 as a novel insulin signaling regulator
Source: PubMed Central journal article supplement (PMC6150497; doi:10.1371/journal.pone.0204100), 2018-09-21
Supplement: pone.0204100.s014.pdf [file pone.0204100.s014.pdf]

**S10 Table. Gene Interactions inferred by BAKE during Adipogenesis Network Expansion.**

| <b>Gene Interaction #</b> | <b>Gene 1</b> | <b>Gene 2</b> | <b>TP/FP</b> | <b>Evidence</b>                                                                                                                                                                                                                                     |
|---------------------------|---------------|---------------|--------------|-----------------------------------------------------------------------------------------------------------------------------------------------------------------------------------------------------------------------------------------------------|
| 1                         | CEBPb         | CEBPb         | TP           | Different probes derived from the same gene                                                                                                                                                                                                         |
| 2                         | CEBPd         | PCK2          | TP           | Regulation of PCK2 by CEBPd is a long distance interaction (Fig. S3)                                                                                                                                                                                |
| 3                         | STAT3         | XDH           | TP           | Regulation of XDH by STAT3 is shown in Fig. S3                                                                                                                                                                                                      |
| 4                         | CEBPb         | TGFB2         | TP           | Regulation of XDH by CEBPb is shown in Fig. S3. In homozygous Xor [Xdh] gene knockout mice expression of mouse TGF- $\beta$ proteins is increased in cytosol of kidney tubular cells (IPA®).                                                        |
| 5                         | GATA3         | TIMP3         | TP           | In synovial fibroblasts from human exhibiting rheumatoid arthritis, TIMP3 protein decreases activation of NFkB complex(es). Activation of NFkB complex(es) is involved in GATA3 mRNA expression (IPA®).                                             |
| 6                         | HMGCS1        | PIK3Cb        | TP           | Long distance regulation (Fig. S3)                                                                                                                                                                                                                  |
| 7                         | CEBPb         | STAT3         | TP           | Regulation of CEBPb by STAT3 is shown in Fig. S3                                                                                                                                                                                                    |
| 8                         | CREB2         | CEBPb         | TP           | Regulation of CEBPb by CREB2 is shown in Fig. S3                                                                                                                                                                                                    |
| 9                         | CEBPb         | SREBF1        | TP           | Regulation of CEBPb by SREBF1 is shown in Fig. S3                                                                                                                                                                                                   |
| 10                        | RXRa          | SREBF1        | TP           | Analysis of the mouse SREBF1 gene promoter revealed an RXR/LXR DNA-binding site that is essential for SREBF1 transcriptional regulation (IPA®).                                                                                                     |
| 11                        | GATA3         | TGFB2         | TP           | TGFB protein(s) decrease(s) expression of GATA3 protein in vitro (IPA®).                                                                                                                                                                            |
| 12                        | GATA3         | SREBF1        | TP           | Regulation of CEBPb by SREBF1 is shown in Fig. S3. A regulatory interaction between CEBPb and TGFB2 is explained above for 4. A regulatory interaction between TGFB2 and GATA3 is explained above for 11. It is a long linear distance interaction. |
| 13                        | CEBPb         | NR1D1         | TP           | NR1D1 regulates the expression of CEBPa, which can regulate PPARg through a feedback loop, which can in turn regulate CEBPb also through a feedback loop. All these interactions are shown in Fig. S3.                                              |
| 14                        | CREB2         | TGFB2         | TP           | CREB2 regulates CEBPb as shown in Fig. S3. Regulation of TGFB2 by CEBPb is explained above for 4. It is a linear long distance interaction.                                                                                                         |
| 15                        | STAT3         | TGFB2         | TP           | STAT3 regulates CEBPb as shown in Fig. S3. Regulation of TGFB2 by CEBPb is explained above for 4. It is a linear long distance interaction.                                                                                                         |

|    |        |        |    |                                                                                                                                                                                                                                                                                                                                           |
|----|--------|--------|----|-------------------------------------------------------------------------------------------------------------------------------------------------------------------------------------------------------------------------------------------------------------------------------------------------------------------------------------------|
| 16 | CREB2  | STAT3  | TP | Activating transcription factor 4 (ATF4/CREB2) mediates hyperglycemia-induced endothelial inflammation and retinal vascular leakage through activation of STAT3 in a mouse model of type 1 diabetes (IPA®).                                                                                                                               |
| 17 | GATA3  | TLE3   | TP | TLE3 regulates expression of CEBPa, which can then regulate CEBPa (due to feedback loop), which can then feedback to the expression of CEBPb. Regulation of TGFB2 by CEBPb is explained above for 4. TGFB2 regulates GATA3 as explained above for 12. Therefore, a regulatory relationship between GATA3 and TLE3 can be inferred (IPA®). |
| 18 | CHD7   | GATA3  | TP | CHD7 regulates the expression of PPARg (Fig. S3). PPARg can in turn regulate CEBPb through a feedback loop. Regulation of TGFB2 by CEBPb is explained above for 4. TGFB2 regulates GATA3 as explained above for 11. Therefore, a regulatory relationship between GATA3 and CHD7 can be inferred (IPA®).                                   |
| 19 | GATA3  | RXRa   | TP | RXRa regulates the expression of PPARg (Fig. S3), which then can be expected to interact with GATA3 using the same reasoning as used for 18. Therefore, a regulatory relationship between GATA3 and RXRa can be inferred.                                                                                                                 |
| 20 | GATA3  | ERK1   | TP | ERK1 regulates the expression of CEBPa (Fig. S3), which shares a regulatory feedback loop with PPARg. The relationship between PPARg and GATA3 can be inferred as for 19. Therefore, a regulatory relationship between GATA3 and ERK1 can be inferred.                                                                                    |
| 21 | NCOR1  | NR1D1  | TP | In C2C12 cells, the receptor interacting domain of RIP13 [NCOR1] decreases repression of a promoter fragment derived from the human Rev-ErbAalpha [NR1D1] gene that is increased by RVR [NR1D2] protein (IPA®).                                                                                                                           |
| 22 | NR1D1  | TGFB2  | TP | NR1D1 regulates CEBPa expression, which can regulate PPARg through a feedback loop, which can in turn regulate CEBPb also through a feedback loop (Fig. S3). The regulatory relationship between CEBPb and TGFB2 can be reasoned as for 4.                                                                                                |
| 23 | PIK3Cd | SETDB1 | FP |                                                                                                                                                                                                                                                                                                                                           |
| 24 | ERK1   | RXRa   | FP |                                                                                                                                                                                                                                                                                                                                           |
| 25 | CHD7   | TLE3   | FP |                                                                                                                                                                                                                                                                                                                                           |
| 26 | CREB2  | SREBF1 | FP |                                                                                                                                                                                                                                                                                                                                           |
| 27 | SREBF1 | STAT3  | FP |                                                                                                                                                                                                                                                                                                                                           |
| 28 | TCF7   | TGFB2  | FP |                                                                                                                                                                                                                                                                                                                                           |
| 29 | RXRa   | SIRT2  | FP |                                                                                                                                                                                                                                                                                                                                           |
| 30 | PIK3Cd | RXRa   | FP |                                                                                                                                                                                                                                                                                                                                           |

|    |        |        |    |  |
|----|--------|--------|----|--|
| 31 | PIK3Cd | SIRT2  | FP |  |
| 32 | EPAC   | TLE3   | FP |  |
| 33 | CHD7   | EPAC   | FP |  |
| 34 | GATA3  | EPAC   | FP |  |
| 35 | GATA3  | LRP6   | FP |  |
| 36 | LRP6   | SREBF1 | FP |  |
| 37 | PIK3Cd | TLE3   | FP |  |
| 38 | CHD7   | PIK3Cd | FP |  |
| 39 | GATA3  | SIRT2  | FP |  |
| 40 | NR1D1  | PIK3Cb | FP |  |
| 41 | NCOR1  | PIK3Cb | FP |  |
| 42 | CREB2  | NR1D1  | FP |  |
| 43 | EPAC   | RXRa   | FP |  |
| 44 | EPAC   | SIRT2  | FP |  |
| 45 | LRP6   | NCOR1  | FP |  |
