# Supplementary material for: Biologically anchored knowledge expansion approach uncovers KLF4 as a novel insulin signaling regulator
Source: PLoS One. 2018 Sep 21;13(9):e0204100. doi: 10.1371/journal.pone.0204100 (PMC6150497; doi:10.1371/journal.pone.0204100)
Supplement: S2 Fig — The central part of the temperature profile shown in Fig 2B bottom panel was magnified. The circled clusters (same as in Fig 2B) are the most stable clusters surviving higher temperatures. Anchor genes within the clusters are highlighted in bold. (PDF) [file pone.0204100.s002.pdf]

## S2 Fig

[illegible]
